# Supplementary material for: Genomic Characterization of Antimicrobial-Resistant Salmonella enterica in Duck, Chicken, and Pig Farms and Retail Markets in Eastern China
Source: PubMed Central journal article supplement (PMC9603869; doi:10.1128/spectrum.01257-22), 2022-09-01
Supplement: spectrum.01257-22-s0001.pdf [file spectrum.01257-22-s0001.pdf]

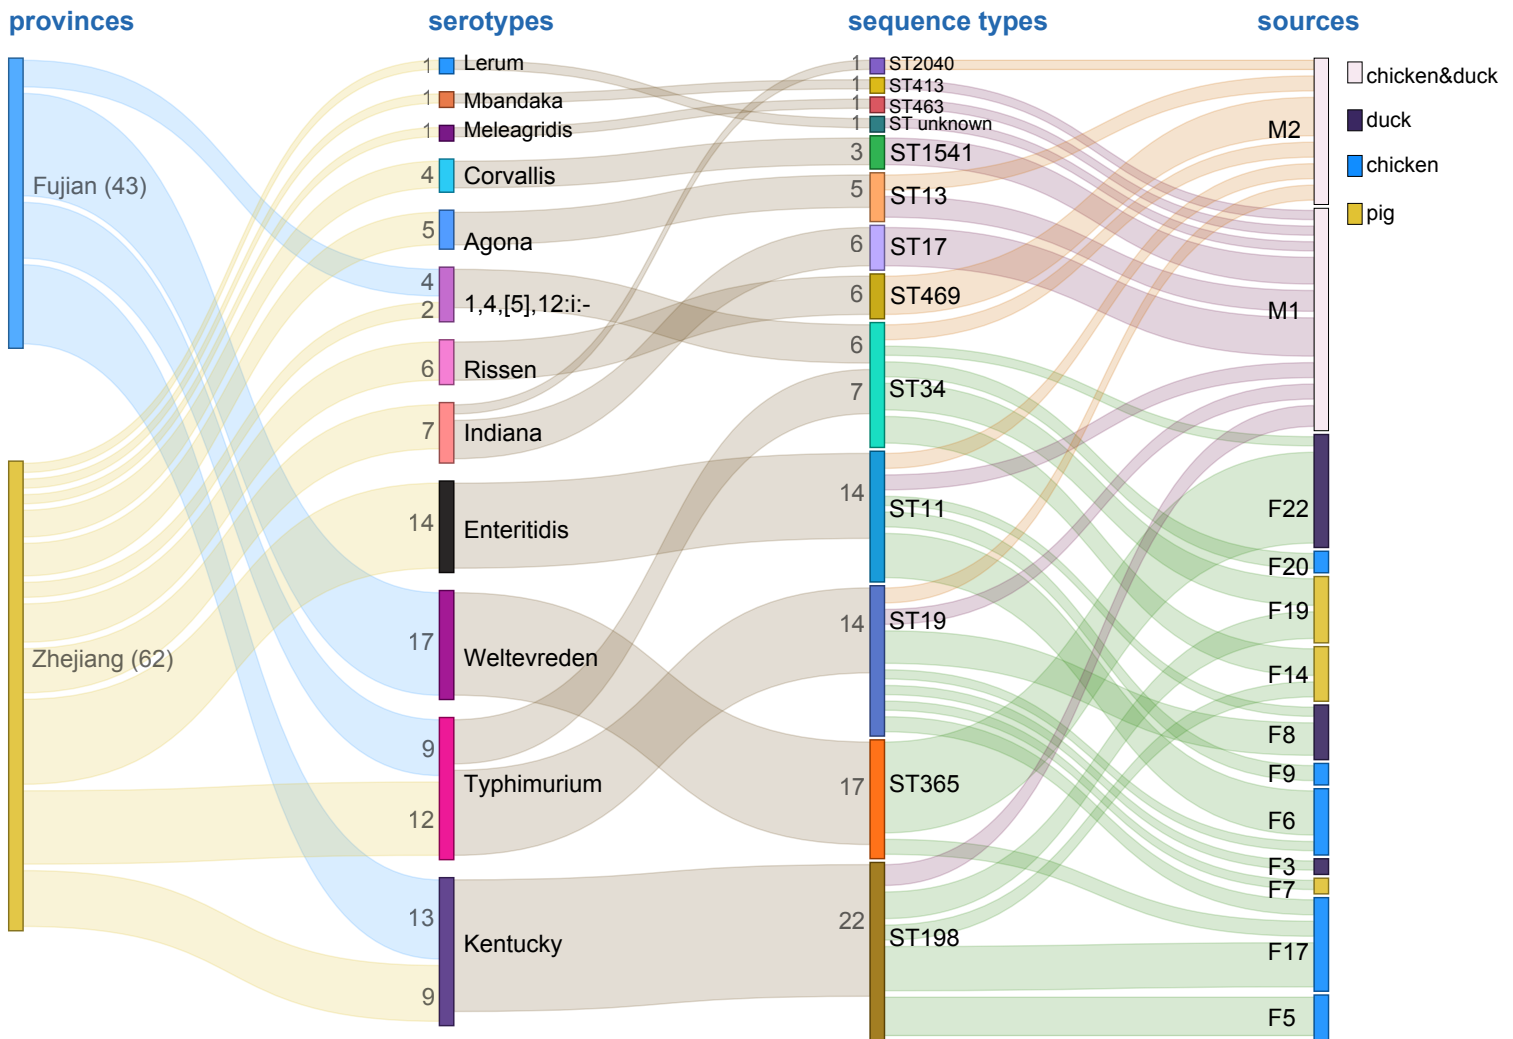

**Figure S3.** Dendrogram of hierarchical clustering heatmap of the AMR phenotypes and farms. Y-axis refers to the farms, and X-axis refers to the AMR phenotypes.



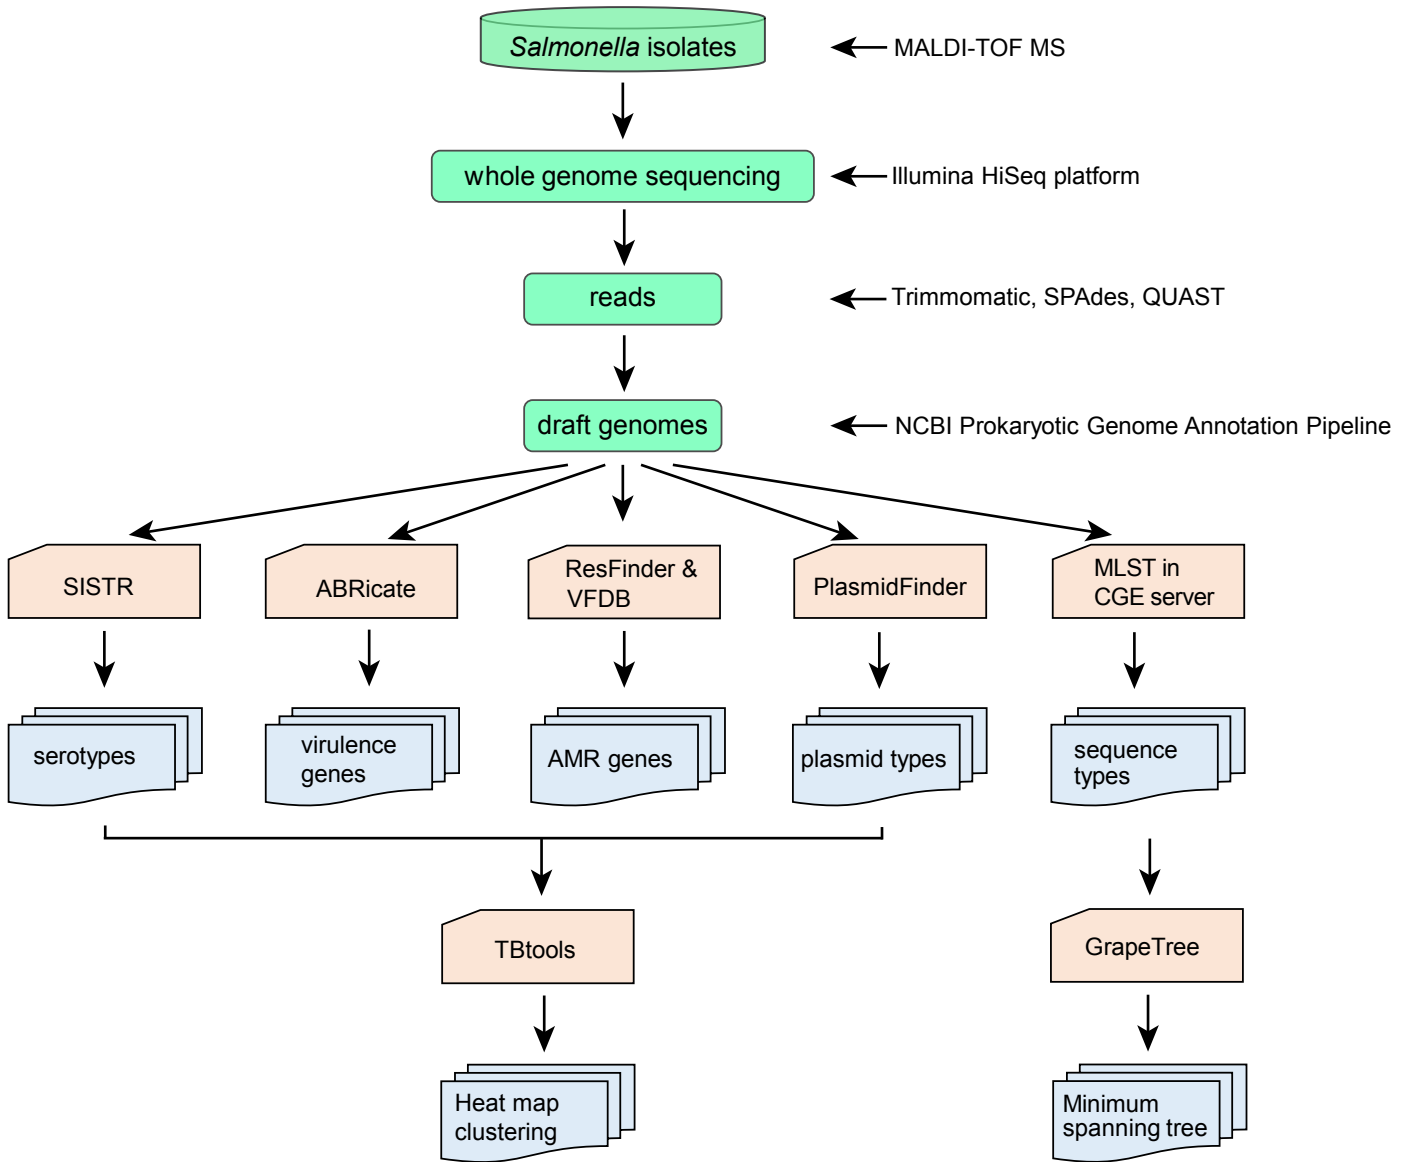

**Figure S5.** Bioinformatics analysis pipeline in this study.

**Table S1.** Sampling and isolation of *Salmonella* in this study

| Province    | City      | Farm    | Animal       | Sample      | <i>Salmonella</i> | Isolation%   |
|-------------|-----------|---------|--------------|-------------|-------------------|--------------|
| Zhejiang    | Ningbo    | F1      | chicken      | 40          | 0                 | 0            |
|             |           | M1      | chicken&duck | 400         | 23                | 5.75         |
|             | Shaoxing  | M2      | chicken&duck | 200         | 15                | 7.5          |
|             |           | F2      | chicken      | 40          | 0                 | 0            |
|             |           | F3      | duck         | 40          | 1                 | 2.5          |
|             | Jiangxing | F4      | chicken      | 40          | 0                 | 0            |
|             |           | F5      | chicken      | 40          | 6                 | 15           |
|             |           | F6      | chicken      | 40          | 8                 | 20           |
|             |           | F7      | pig          | 40          | 1                 | 2.5          |
|             |           | F8      | duck         | 40          | 6                 | 15           |
| Jinhua      | F9        | chicken | 40           | 2           | 5                 |              |
|             | F10       | pig     | 40           | 0           | 0                 |              |
| <b>Sum:</b> |           |         |              | <b>1000</b> | <b>62</b>         | <b>6.2</b>   |
| Fujian      | Fuzhou    | F11     | chicken      | 40          | 0                 | 0            |
|             |           | F12     | chicken      | 40          | 0                 | 0            |
|             | Nanping   | F13     | chicken      | 40          | 0                 | 0            |
|             |           | F14     | pig          | 40          | 6                 | 15           |
|             | Xiamen    | F15     | pig          | 40          | 0                 | 0            |
|             |           | F16     | pig          | 40          | 0                 | 0            |
|             |           | F17     | chicken      | 40          | 11                | 27.5         |
|             | Putian    | F18     | chicken      | 40          | 0                 | 0            |
|             |           | F19     | chicken      | 40          | 8                 | 20           |
|             | Zhangzhou | F20     | chicken      | 40          | 2                 | 5            |
| F21         |           | chicken | 40           | 0           | 0                 |              |
| F22         |           | duck    | 40           | 16          | 40                |              |
| <b>Sum:</b> |           |         |              | <b>480</b>  | <b>43</b>         | <b>8.959</b> |

**Table S2.** Statistics of the prevalence between different sampling groups.

| groups                    | <i>Salmonella</i><br>(+) | <i>Salmonella</i><br>(-) | samples | proportion% | $\chi^2$ | <i>P</i>       |
|---------------------------|--------------------------|--------------------------|---------|-------------|----------|----------------|
| Zhejiang                  | <b>62</b>                | <b>938</b>               | 1000    | 6.20        | 3.743729 | <b>0.05301</b> |
| Fujian                    | <b>43</b>                | <b>437</b>               | 480     | 8.96        |          |                |
| Sum:                      | 105                      | 1375                     | 1480    |             |          |                |
| Chicken                   | <b>37</b>                | <b>523</b>               | 560     | 6.61        | 19.37678 | <b>0.00002</b> |
| Duck                      | <b>23</b>                | <b>97</b>                | 120     | 19.17       |          |                |
| Sum:                      | 60                       | 620                      | 680     |             |          |                |
| Duck                      | <b>23</b>                | <b>97</b>                | 120     | 19.17       | 21.66682 | <b>0.00001</b> |
| Pig                       | <b>7</b>                 | <b>193</b>               | 200     | 3.50        |          |                |
| Sum:                      | 30                       | 290                      | 320     |             |          |                |
| Chicken                   | <b>37</b>                | <b>523</b>               | 560     | 6.61        | 2.608485 | <b>0.1063</b>  |
| Pig                       | <b>7</b>                 | <b>193</b>               | 200     | 3.50        |          |                |
| Sum:                      | 44                       | 716                      | 760     |             |          |                |
| live animal<br>markets    | <b>38</b>                | <b>562</b>               | 600     | 6.34        | 2.79572  | <b>0.09452</b> |
| Chicken and<br>duck farms | <b>60</b>                | <b>620</b>               | 680     | 8.83        |          |                |
| Sum:                      | 98                       | 1182                     | 1280    |             |          |                |

**Table S3.** The prevalence, antimicrobial resistance, and genomic characterization of 105 *Salmonella* isolates.

| abbreviation | strain        | in silico Serotype | Species           | Provienc | location   | City     | Animal       | ST   | aroC | dnaN | hemD |
|--------------|---------------|--------------------|-------------------|----------|------------|----------|--------------|------|------|------|------|
| z01          | SC-Z1910-0001 | Typhimurium        | <i>Salmonella</i> | Zhejiang | 天天田园 [M2]  | Shaoxing | Chicken&Duck | 19   | 10   | 7    | 12   |
| z02          | SC-Z1910-0002 | Rissen             | <i>Salmonella</i> | Zhejiang | 天天田园 [M2]  | Shaoxing | Chicken&Duck | 469  | 92   | 107  | 79   |
| z03          | SC-Z1910-0003 | Rissen             | <i>Salmonella</i> | Zhejiang | 天天田园 [M2]  | Shaoxing | Chicken&Duck | 469  | 92   | 107  | 79   |
| z04          | SC-Z1910-0004 | Rissen             | <i>Salmonella</i> | Zhejiang | 天天田园 [M2]  | Shaoxing | Chicken&Duck | 469  | 92   | 107  | 79   |
| z05          | SC-Z1910-0005 | Enteritidis        | <i>Salmonella</i> | Zhejiang | 天天田园 [M2]  | Shaoxing | Chicken&Duck | 11   | 5    | 2    | 3    |
| z06          | SC-Z1910-0006 | Typhimurium        | <i>Salmonella</i> | Zhejiang | 天天田园 [M2]  | Shaoxing | Chicken&Duck | 19   | 10   | 7    | 12   |
| z07          | SC-Z1910-0007 | Rissen             | <i>Salmonella</i> | Zhejiang | 天天田园 [M2]  | Shaoxing | Chicken&Duck | 469  | 92   | 107  | 79   |
| z08          | SC-Z1910-0008 | Enteritidis        | <i>Salmonella</i> | Zhejiang | 天天田园 [M2]  | Shaoxing | Chicken&Duck | 11   | 5    | 2    | 3    |
| z09          | SC-Z1910-0009 | Indiana            | <i>Salmonella</i> | Zhejiang | 天天田园 [M2]  | Shaoxing | Chicken&Duck | 2040 | 302  | 8    | 11   |
| z10          | SC-Z1910-0010 | Rissen             | <i>Salmonella</i> | Zhejiang | 天天田园肉 [M2] | Shaoxing | Chicken&Duck | 469  | 92   | 107  | 79   |
| z11          | SD-Z1910-0011 | Typhimurium        | <i>Salmonella</i> | Zhejiang | 国伟禽业 [F3]  | Shaoxing | Duck         | 19   | 10   | 7    | 12   |
| z12          | SC-Z1910-0012 | Kentucky           | <i>Salmonella</i> | Zhejiang | 水乡情农场 [F5] | Jiaxing  | Chicken      | 198  | 76   | 14   | 3    |
| z13          | SC-Z1910-0013 | Kentucky           | <i>Salmonella</i> | Zhejiang | 水乡情农场 [F5] | Jiaxing  | Chicken      | 198  | 76   | 14   | 3    |
| z14          | SC-Z1910-0014 | Kentucky           | <i>Salmonella</i> | Zhejiang | 水乡情农场 [F5] | Jiaxing  | Chicken      | 198  | 76   | 14   | 3    |
| z15          | SC-Z1910-0015 | Kentucky           | <i>Salmonella</i> | Zhejiang | 水乡情农场 [F5] | Jiaxing  | Chicken      | 198  | 76   | 14   | 3    |
| z16          | SP-Z1910-0016 | Typhimurium        | <i>Salmonella</i> | Zhejiang | 嘉华 [F7]    | Jiaxing  | Pig          | 19   | 10   | 7    | 12   |
| z17          | SC-Z1910-0017 | Enteritidis        | <i>Salmonella</i> | Zhejiang | 马库 [F6]    | Jiaxing  | Chicken      | 11   | 5    | 2    | 3    |
| z18          | SC-Z1910-0018 | Enteritidis        | <i>Salmonella</i> | Zhejiang | 马库 [F6]    | Jiaxing  | Chicken      | 11   | 5    | 2    | 3    |
| z19          | SC-Z1910-0019 | Typhimurium        | <i>Salmonella</i> | Zhejiang | 马库 [F6]    | Jiaxing  | Chicken      | 19   | 10   | 7    | 12   |
| z20          | SC-Z1910-0020 | Kentucky           | <i>Salmonella</i> | Zhejiang | 水乡情 [F5]   | Jiaxing  | Chicken      | 198  | 76   | 14   | 3    |
| z21          | SC-Z1910-0021 | Enteritidis        | <i>Salmonella</i> | Zhejiang | 马库 [F6]    | Jiaxing  | Chicken      | 11   | 5    | 2    | 3    |
| z22          | SC-Z1910-0022 | Enteritidis        | <i>Salmonella</i> | Zhejiang | 马库 [F6]    | Jiaxing  | Chicken      | 11   | 5    | 2    | 3    |
| z23          | SC-Z1910-0023 | Enteritidis        | <i>Salmonella</i> | Zhejiang | 马库 [F6]    | Jiaxing  | Chicken      | 11   | 5    | 2    | 3    |
| z24          | SC-Z1910-0024 | Enteritidis        | <i>Salmonella</i> | Zhejiang | 马库 [F6]    | Jiaxing  | Chicken      | 11   | 5    | 2    | 3    |
| z25          | SC-Z1910-0025 | Enteritidis        | <i>Salmonella</i> | Zhejiang | 马库 [F6]    | Jiaxing  | Chicken      | 11   | 5    | 2    | 3    |
| z26          | SC-Z1910-0026 | Kentucky           | <i>Salmonella</i> | Zhejiang | 水乡情 [F5]   | Jiaxing  | Chicken      | 198  | 76   | 14   | 3    |
| z27          | SD-Z1910-0027 | Typhimurium        | <i>Salmonella</i> | Zhejiang | 金婺 [F8]    | Jinhua   | Duck         | 19   | 10   | 7    | 12   |
| z28          | SD-Z1910-0028 | Enteritidis        | <i>Salmonella</i> | Zhejiang | 金婺 [F8]    | Jinhua   | Duck         | 11   | 5    | 2    | 3    |
| z29          | SD-Z1910-0029 | Typhimurium        | <i>Salmonella</i> | Zhejiang | 金婺 [F8]    | Jinhua   | Duck         | 19   | 10   | 7    | 12   |
| z30          | SD-Z1910-0030 | Typhimurium        | <i>Salmonella</i> | Zhejiang | 金婺 [F8]    | Jinhua   | Duck         | 19   | 10   | 7    | 12   |
| z31          | SD-Z1910-0031 | Typhimurium        | <i>Salmonella</i> | Zhejiang | 金婺 [F8]    | Jinhua   | Duck         | 19   | 10   | 7    | 12   |
| z32          | SD-Z1910-0032 | Typhimurium        | <i>Salmonella</i> | Zhejiang | 金婺 [F8]    | Jinhua   | Duck         | 19   | 10   | 7    | 12   |
| z33          | SC-Z1910-0033 | Enteritidis        | <i>Salmonella</i> | Zhejiang | 绿发农业 [F9]  | Jinhua   | Chicken      | 11   | 5    | 2    | 3    |
| z34          | SC-Z1910-0034 | Enteritidis        | <i>Salmonella</i> | Zhejiang | 绿发农业 [F9]  | Jinhua   | Chicken      | 11   | 5    | 2    | 3    |
| z35          | SD-F1910-0035 | Weltevreden        | <i>Salmonella</i> | Fujian   | 比格山 [F22]  | hangzhc  | Duck         | 365  | 130  | 97   | 25   |
| z36          | SD-F1910-0036 | Weltevreden        | <i>Salmonella</i> | Fujian   | 比格山 [F22]  | hangzhc  | Duck         | 365  | 130  | 97   | 25   |
| z37          | SD-F1910-0037 | Weltevreden        | <i>Salmonella</i> | Fujian   | 比格山 [F22]  | hangzhc  | Duck         | 365  | 130  | 97   | 25   |
| z38          | SD-F1910-0038 | Weltevreden        | <i>Salmonella</i> | Fujian   | 比格山 [F22]  | hangzhc  | Duck         | 365  | 130  | 97   | 25   |



|     |               |                |            |          |             |          |              |     |     |     |    |
|-----|---------------|----------------|------------|----------|-------------|----------|--------------|-----|-----|-----|----|
| z39 | SD-F1910-0039 | Weltevreden    | Salmonella | Fujian   | 比格山 [F22]   | hangzhc  | Duck         | 365 | 130 | 97  | 25 |
| z40 | SD-F1910-0040 | Weltevreden    | Salmonella | Fujian   | 比格山 [F22]   | hangzhc  | Duck         | 365 | 130 | 97  | 25 |
| z41 | SD-F1910-0041 | Weltevreden    | Salmonella | Fujian   | 比格山 [F22]   | hangzhc  | Duck         | 365 | 130 | 97  | 25 |
| z42 | SD-F1910-0042 | Weltevreden    | Salmonella | Fujian   | 比格山 [F22]   | hangzhc  | Duck         | 365 | 130 | 97  | 25 |
| z43 | SD-F1910-0043 | Weltevreden    | Salmonella | Fujian   | 比格山 [F22]   | hangzhc  | Duck         | 365 | 130 | 97  | 25 |
| z44 | SD-F1910-0044 | Weltevreden    | Salmonella | Fujian   | 比格山 [F22]   | hangzhc  | Duck         | 365 | 130 | 97  | 25 |
| z45 | SD-F1910-0045 | Weltevreden    | Salmonella | Fujian   | 比格山 [F22]   | hangzhc  | Duck         | 365 | 130 | 97  | 25 |
| z46 | SD-F1910-0046 | Weltevreden    | Salmonella | Fujian   | 比格山 [F22]   | hangzhc  | Duck         | 365 | 130 | 97  | 25 |
| z47 | SD-F1910-0047 | Weltevreden    | Salmonella | Fujian   | 比格山 [F22]   | hangzhc  | Duck         | 365 | 130 | 97  | 25 |
| z48 | SD-F1910-0048 | Weltevreden    | Salmonella | Fujian   | 比格山 [F22]   | hangzhc  | Duck         | 365 | 130 | 97  | 25 |
| z49 | SC-F1910-0049 | Weltevreden    | Salmonella | Fujian   | 温氏1号厂 [F17] | Putian   | Chicken      | 365 | 130 | 97  | 25 |
| z50 | SC-F1910-0050 | Weltevreden    | Salmonella | Fujian   | 温氏1号厂 [F17] | Putian   | Chicken      | 365 | 130 | 97  | 25 |
| z51 | SC-F1910-0051 | Kentucky       | Salmonella | Fujian   | 温氏1号厂 [F17] | Putian   | Chicken      | 198 | 76  | 14  | 3  |
| z52 | SC-F1910-0052 | Kentucky       | Salmonella | Fujian   | 温氏1号厂 [F17] | Putian   | Chicken      | 198 | 76  | 14  | 3  |
| z53 | SC-F1910-0053 | Kentucky       | Salmonella | Fujian   | 温氏1号厂 [F17] | Putian   | Chicken      | 198 | 76  | 14  | 3  |
| z54 | SC-F1910-0054 | Kentucky       | Salmonella | Fujian   | 温氏1号厂 [F17] | Putian   | Chicken      | 198 | 76  | 14  | 3  |
| z55 | SC-F1910-0055 | Kentucky       | Salmonella | Fujian   | 木兰屠宰场 [F19] | Putian   | Chicken      | 198 | 76  | 14  | 3  |
| z56 | SC-F1910-0056 | Kentucky       | Salmonella | Fujian   | 木兰屠宰场 [F19] | Putian   | Chicken      | 198 | 76  | 14  | 3  |
| z57 | SC-F1910-0057 | Typhimurium    | Salmonella | Fujian   | 木兰屠宰场 [F19] | Putian   | Chicken      | 34  | 10  | 19  | 12 |
| z58 | SC-F1910-0058 | Typhimurium    | Salmonella | Fujian   | 木兰屠宰场 [F19] | Putian   | Chicken      | 34  | 10  | 19  | 12 |
| z59 | SC-F1910-0059 | Typhimurium    | Salmonella | Fujian   | 木兰屠宰场 [F19] | Putian   | Chicken      | 34  | 10  | 19  | 12 |
| z60 | SC-F1910-0060 | Typhimurium    | Salmonella | Fujian   | 碧山 [F20]    | hangzhc  | Chicken      | 34  | 10  | 19  | 12 |
| z61 | SD-F1910-0061 | Typhimurium    | Salmonella | Fujian   | 比格山 [F22]   | hangzhc  | Duck         | 34  | 10  | 19  | 12 |
| z62 | SD-F1910-0062 | Weltevreden    | Salmonella | Fujian   | 比格山 [F22]   | hangzhc  | Duck         | 365 | 130 | 97  | 25 |
| z63 | SC-F1910-0063 | Typhimurium    | Salmonella | Fujian   | 温氏1号厂 [F17] | Putian   | Chicken      | 19  | 10  | 7   | 12 |
| z64 | SC-F1910-0064 | Typhimurium    | Salmonella | Fujian   | 温氏1号厂 [F17] | Putian   | Chicken      | 19  | 10  | 7   | 12 |
| z65 | SC-F1910-0065 | Kentucky       | Salmonella | Fujian   | 温氏1号厂 [F17] | Putian   | Chicken      | 198 | 76  | 14  | 3  |
| z66 | SC-F1910-0066 | Kentucky       | Salmonella | Fujian   | 温氏1号厂 [F17] | Putian   | Chicken      | 198 | 76  | 14  | 3  |
| z67 | SC-F1910-0067 | Kentucky       | Salmonella | Fujian   | 温氏1号厂 [F17] | Putian   | Chicken      | 198 | 76  | 14  | 3  |
| z68 | SC-F1910-0068 | Kentucky       | Salmonella | Fujian   | 木兰屠宰场 [F19] | Putian   | Chicken      | 198 | 76  | 14  | 3  |
| z69 | SC-F1910-0069 | Kentucky       | Salmonella | Fujian   | 木兰屠宰场 [F19] | Putian   | Chicken      | 198 | 76  | 14  | 3  |
| z70 | SC-F1910-0070 | Typhimurium    | Salmonella | Fujian   | 木兰屠宰场 [F19] | Putian   | Chicken      | 34  | 10  | 19  | 12 |
| z71 | SC-F1910-0071 | Typhimurium    | Salmonella | Fujian   | 碧山 [F20]    | hangzhc  | Chicken      | 34  | 10  | 19  | 12 |
| z72 | SP-F1910-0072 | Kentucky       | Salmonella | Fujian   | 品加工 (屠宰场)   | Xiamen   | Pig          | 198 | 76  | 14  | 3  |
| z73 | SP-F1910-0073 | Kentucky       | Salmonella | Fujian   | 品加工 (屠宰场)   | Xiamen   | Pig          | 198 | 76  | 14  | 3  |
| z75 | SP-F1910-0075 | 1,4,[5],12:i:- | Salmonella | Fujian   | 品加工 (屠宰场)   | Xiamen   | Pig          | 34  | 10  | 19  | 12 |
| z76 | SP-F1910-0076 | 1,4,[5],12:i:- | Salmonella | Fujian   | 品加工 (屠宰场)   | Xiamen   | Pig          | 34  | 10  | 19  | 12 |
| z77 | SP-F1910-0077 | 1,4,[5],12:i:- | Salmonella | Fujian   | 品加工 (屠宰场)   | Xiamen   | Pig          | 34  | 10  | 19  | 12 |
| z78 | SP-F1910-0078 | 1,4,[5],12:i:- | Salmonella | Fujian   | 品加工 (屠宰场)   | Xiamen   | Pig          | 34  | 10  | 19  | 12 |
| z79 | SD-Z1910-0079 | 1,4,[5],12:i:- | Salmonella | Zhejiang | 天天田园 [M2]   | Shaoxing | Chicken&Duck | 34  | 10  | 19  | 12 |
| z80 | SD-Z1910-0080 | 1,4,[5],12:i:- | Salmonella | Zhejiang | 天天田园 [M2]   | Shaoxing | Chicken&Duck | 34  | 10  | 19  | 12 |
| z81 | SD-Z1910-0081 | Rissen         | Salmonella | Zhejiang | 天天田园 [M2]   | Shaoxing | Chicken&Duck | 469 | 92  | 107 | 79 |
| z83 | SD-Z1910-0083 | Agona          | Salmonella | Zhejiang | 天天田园 [M2]   | Shaoxing | Chicken&Duck | 13  | 3   | 3   | 7  |

|      |               |                |                   |          |           |          |              |         |     |      |    |
|------|---------------|----------------|-------------------|----------|-----------|----------|--------------|---------|-----|------|----|
| z84  | SD-Z1910-0084 | Agona          | <i>Salmonella</i> | Zhejiang | 天天田园 [M2] | Shaoxing | Chicken&Duck | 13      | 3   | 3    | 7  |
| z85  | SC-Z1910-0085 | Agona          | <i>Salmonella</i> | Zhejiang | 宁波余姚 [M1] | Ningbo   | Chicken&Duck | 13      | 3   | 3    | 7  |
| z86  | SC-Z1910-0086 | Agona          | <i>Salmonella</i> | Zhejiang | 宁波余姚 [M1] | Ningbo   | Chicken&Duck | 13      | 3   | 3    | 7  |
| z87  | SC-Z1910-0087 | Agona          | <i>Salmonella</i> | Zhejiang | 宁波余姚 [M1] | Ningbo   | Chicken&Duck | 13      | 3   | 3    | 7  |
| z88  | SC-Z1910-0088 | Indiana        | <i>Salmonella</i> | Zhejiang | 宁波余姚 [M1] | Ningbo   | Chicken&Duck | 17      | 8   | 8    | 11 |
| z89  | SC-Z1910-0089 | Indiana        | <i>Salmonella</i> | Zhejiang | 宁波余姚 [M1] | Ningbo   | Chicken&Duck | 17      | 8   | 8    | 11 |
| z90  | SC-Z1910-0090 | Meleagridis    | <i>Salmonella</i> | Zhejiang | 宁波余姚 [M1] | Ningbo   | Chicken&Duck | 463     | 92  | 125  | 78 |
| z91  | SD-Z1910-0091 | Huddinge Lerum | <i>Salmonella</i> | Zhejiang | 宁波余姚 [M1] | Ningbo   | Chicken&Duck | unknown | 8   | -795 | 11 |
| z92  | SD-Z1910-0092 | Enteritidis    | <i>Salmonella</i> | Zhejiang | 宁波余姚 [M1] | Ningbo   | Chicken&Duck | 11      | 5   | 2    | 3  |
| z93  | SD-Z1910-0093 | Enteritidis    | <i>Salmonella</i> | Zhejiang | 宁波余姚 [M1] | Ningbo   | Chicken&Duck | 11      | 5   | 2    | 3  |
| z94  | SD-Z1910-0094 | Indiana        | <i>Salmonella</i> | Zhejiang | 宁波余姚 [M1] | Ningbo   | Chicken&Duck | 17      | 8   | 8    | 11 |
| z95  | SD-Z1910-0095 | Typhimurium    | <i>Salmonella</i> | Zhejiang | 宁波余姚 [M1] | Ningbo   | Chicken&Duck | 19      | 10  | 7    | 12 |
| z96  | SD-Z1910-0096 | Indiana        | <i>Salmonella</i> | Zhejiang | 宁波余姚 [M1] | Ningbo   | Chicken&Duck | 17      | 8   | 8    | 11 |
| z97  | SC-Z1910-0097 | Indiana        | <i>Salmonella</i> | Zhejiang | 宁波余姚 [M1] | Ningbo   | Chicken&Duck | 17      | 8   | 8    | 11 |
| z98  | SC-Z1910-0098 | Typhimurium    | <i>Salmonella</i> | Zhejiang | 宁波余姚 [M1] | Ningbo   | Chicken&Duck | 19      | 10  | 7    | 12 |
| z99  | SC-Z1910-0099 | Indiana        | <i>Salmonella</i> | Zhejiang | 宁波余姚 [M1] | Ningbo   | Chicken&Duck | 17      | 8   | 8    | 11 |
| z100 | SC-Z1910-0100 | Corvallis      | <i>Salmonella</i> | Zhejiang | 宁波余姚 [M1] | Ningbo   | Chicken&Duck | 1541    | 197 | 187  | 10 |
| z101 | SC-Z1910-0101 | Kentucky       | <i>Salmonella</i> | Zhejiang | 宁波余姚 [M1] | Ningbo   | Chicken&Duck | 198     | 76  | 14   | 3  |
| z102 | SC-Z1910-0102 | Mbandaka       | <i>Salmonella</i> | Zhejiang | 宁波余姚 [M1] | Ningbo   | Chicken&Duck | 413     | 15  | 70   | 93 |
| z103 | SC-Z1910-0103 | Corvallis      | <i>Salmonella</i> | Zhejiang | 宁波余姚 [M1] | Ningbo   | Chicken&Duck | 1541    | 197 | 187  | 10 |
| z104 | SC-Z1910-0104 | Corvallis      | <i>Salmonella</i> | Zhejiang | 宁波余姚 [M1] | Ningbo   | Chicken&Duck | 1541    | 197 | 187  | 10 |
| z105 | SC-Z1910-0105 | Kentucky       | <i>Salmonella</i> | Zhejiang | 宁波余姚 [M1] | Ningbo   | Chicken&Duck | 198     | 76  | 14   | 3  |
| z106 | SC-Z1910-0106 | Kentucky       | <i>Salmonella</i> | Zhejiang | 宁波余姚 [M1] | Ningbo   | Chicken&Duck | 198     | 76  | 14   | 3  |
| z107 | SC-Z1910-0107 | Corvallis      | <i>Salmonella</i> | Zhejiang | 宁波余姚 [M1] | Ningbo   | Chicken&Duck | 1541    | 197 | 187  | 10 |

| <i>hisD</i> | <i>purE</i> | <i>sucA</i> | <i>thrA</i> | O       | H1  | H2  | Col156  | ColpVC | IncFIA(HI1) | IncFIB(K) | IncFIB(S) | IncFIB(pC1) | IncFIB(pHC) |
|-------------|-------------|-------------|-------------|---------|-----|-----|---------|--------|-------------|-----------|-----------|-------------|-------------|
|             |             |             |             |         |     |     | plasmid |        |             |           |           |             |             |
| <i>hisD</i> | <i>purE</i> | <i>sucA</i> | <i>thrA</i> | O       | H1  | H2  | Col156  | ColpVC | IncFIA(HI1) | IncFIB(K) | IncFIB(S) | IncFIB(pC1) | IncFIB(pHC) |
| 9           | 5           | 9           | 2           | 4,5     | i   | 2   | 0       | 0      | 0           | 0         | 1         | 0           | 0           |
| 156         | 64          | 151         | 87          | 6,7     | f   |     | 0       | 0      | 0           | 0         | 0         | 0           | 0           |
| 156         | 64          | 151         | 87          | 6,7     | f   |     | 0       | 0      | 0           | 0         | 0         | 0           | 0           |
| 156         | 64          | 151         | 87          | 6,7     | f   |     | 0       | 0      | 0           | 0         | 0         | 0           | 0           |
| 7           | 6           | 6           | 11          | 9       | m   |     | 0       | 0      | 0           | 0         | 1         | 0           | 0           |
| 9           | 5           | 9           | 2           | 4,5     | i   | 2   | 0       | 0      | 0           | 0         | 1         | 0           | 0           |
| 156         | 64          | 151         | 87          | 6,7     | f   |     | 0       | 0      | 0           | 0         | 0         | 0           | 0           |
| 7           | 6           | 6           | 11          | 9       | m   |     | 0       | 0      | 0           | 0         | 1         | 0           | 0           |
| 11          | 5           | 11          | 15          | 4,12    | i   | 1,6 | 0       | 0      | 0           | 0         | 0         | 0           | 0           |
| 156         | 64          | 151         | 87          | 6,7     | f   |     | 0       | 0      | 0           | 0         | 0         | 0           | 0           |
| 9           | 5           | 9           | 2           | 4       | i   | 2   | 0       | 0      | 0           | 0         | 1         | 0           | 0           |
| 77          | 64          | 64          | 67          | 8,20    | i   | z6  | 1       | 0      | 0           | 0         | 1         | 0           | 0           |
| 77          | 64          | 64          | 67          | 8,20    | i   | z6  | 1       | 0      | 0           | 0         | 0         | 0           | 0           |
| 77          | 64          | 64          | 67          | 8,20    | i   | z6  | 1       | 0      | 0           | 0         | 0         | 0           | 0           |
| 77          | 64          | 64          | 67          | 8,20    | i   | z6  | 1       | 0      | 0           | 0         | 0         | 0           | 0           |
| 9           | 5           | 9           | 2           | 4,5     | i   | 2   | 0       | 0      | 0           | 0         | 1         | 0           | 0           |
| 7           | 6           | 6           | 11          | 9       | m   |     | 0       | 1      | 0           | 0         | 0         | 0           | 0           |
| 7           | 6           | 6           | 11          | 9       | m   |     | 0       | 1      | 0           | 0         | 0         | 0           | 0           |
| 9           | 5           | 9           | 2           | 4,5     | i   | 2   | 0       | 0      | 0           | 0         | 1         | 0           | 0           |
| 77          | 64          | 64          | 67          | 8,20    | i   | z6  | 1       | 0      | 0           | 0         | 0         | 0           | 0           |
| 7           | 6           | 6           | 11          | 9,12    | g,m |     | 0       | 1      | 0           | 0         | 0         | 0           | 0           |
| 7           | 6           | 6           | 11          | 9,12    | g,m |     | 0       | 1      | 0           | 0         | 0         | 0           | 0           |
| 7           | 6           | 6           | 11          | 9,12    | g,m |     | 0       | 1      | 0           | 0         | 0         | 0           | 0           |
| 7           | 6           | 6           | 11          | 9,12    | g,m |     | 0       | 1      | 0           | 0         | 0         | 0           | 0           |
| 7           | 6           | 6           | 11          | 9,12    | g,m |     | 0       | 1      | 0           | 0         | 0         | 0           | 0           |
| 77          | 64          | 64          | 67          | 8,20    | i   | z6  | 1       | 0      | 0           | 0         | 0         | 0           | 0           |
| 9           | 5           | 9           | 2           | 4,5     | i   | 2   | 0       | 0      | 0           | 0         | 1         | 0           | 0           |
| 7           | 6           | 6           | 11          | 9,12    | g,m |     | 0       | 1      | 0           | 0         | 0         | 0           | 0           |
| 9           | 5           | 9           | 2           | 4,5     | i   | 2   | 0       | 0      | 0           | 0         | 1         | 0           | 0           |
| 9           | 5           | 9           | 2           | 4,5     | i   | 2   | 0       | 0      | 0           | 0         | 1         | 0           | 0           |
| 9           | 5           | 9           | 2           | 4,5     | i   | 2   | 0       | 0      | 0           | 0         | 1         | 0           | 0           |
| 9           | 5           | 9           | 2           | 4,5     | i   | 2   | 0       | 0      | 0           | 0         | 1         | 0           | 0           |
| 7           | 6           | 6           | 11          | 9,12    | g,m |     | 0       | 0      | 0           | 0         | 1         | 0           | 0           |
| 7           | 6           | 6           | 11          | 9,12    | g,m |     | 0       | 0      | 0           | 0         | 1         | 0           | 0           |
| 125         | 84          | 9           | 101         | 3,10,15 | r   | z6  | 0       | 0      | 0           | 0         | 0         | 0           | 0           |
| 125         | 84          | 9           | 101         | 3,10,15 | r   | z6  | 0       | 0      | 0           | 0         | 0         | 0           | 0           |
| 125         | 84          | 9           | 101         | 3,10,15 | r   | z6  | 0       | 0      | 0           | 0         | 0         | 0           | 0           |
| 125         | 84          | 9           | 101         | 3,10,15 | r   | z6  | 0       | 0      | 0           | 0         | 0         | 0           | 0           |

|     |    |     |     |         |   |    |   |   |   |   |   |   |   |
|-----|----|-----|-----|---------|---|----|---|---|---|---|---|---|---|
| 125 | 84 | 9   | 101 | 3,10,15 | r | z6 | 0 | 0 | 0 | 0 | 0 | 0 | 0 |
| 125 | 84 | 9   | 101 | 3,10,15 | r | z6 | 0 | 0 | 0 | 0 | 0 | 0 | 0 |
| 125 | 84 | 9   | 101 | 3,10,15 | r | z6 | 0 | 0 | 0 | 0 | 0 | 0 | 0 |
| 125 | 84 | 9   | 101 | 3,10,15 | r | z6 | 0 | 0 | 0 | 0 | 0 | 0 | 0 |
| 125 | 84 | 9   | 101 | 3,10,15 | r | z6 | 0 | 0 | 0 | 0 | 0 | 0 | 0 |
| 125 | 84 | 9   | 101 | 3,10,15 | r | z6 | 0 | 0 | 0 | 0 | 0 | 0 | 0 |
| 125 | 84 | 9   | 101 | 3,10,15 | r | z6 | 0 | 0 | 0 | 0 | 0 | 0 | 0 |
| 125 | 84 | 9   | 101 | 3,10,15 | r | z6 | 0 | 0 | 0 | 0 | 0 | 0 | 0 |
| 125 | 84 | 9   | 101 | 3,10,15 | r | z6 | 0 | 0 | 0 | 0 | 0 | 0 | 0 |
| 125 | 84 | 9   | 101 | 3,10,15 | r | z6 | 0 | 0 | 0 | 0 | 0 | 0 | 0 |
| 125 | 84 | 9   | 101 | 3,10,15 | r | z6 | 0 | 0 | 0 | 0 | 0 | 0 | 0 |
| 125 | 84 | 9   | 101 | 3,10,15 | r | z6 | 0 | 0 | 0 | 0 | 0 | 0 | 0 |
| 125 | 84 | 9   | 101 | 3,10,15 | r | z6 | 0 | 0 | 0 | 0 | 0 | 0 | 0 |
| 77  | 64 | 64  | 67  | 8,20    | i | z6 | 0 | 0 | 0 | 0 | 0 | 0 | 0 |
| 77  | 64 | 64  | 67  | 8,20    | i | z6 | 0 | 0 | 0 | 0 | 0 | 0 | 0 |
| 77  | 64 | 64  | 67  | 8,20    | i | z6 | 0 | 0 | 0 | 0 | 0 | 0 | 0 |
| 77  | 64 | 64  | 67  | 8,20    | i | z6 | 0 | 0 | 0 | 0 | 0 | 0 | 0 |
| 77  | 64 | 64  | 67  | 8,20    | i | z6 | 1 | 0 | 0 | 0 | 0 | 0 | 0 |
| 77  | 64 | 64  | 67  | 8,20    | i | z6 | 0 | 0 | 0 | 0 | 0 | 0 | 0 |
| 9   | 5  | 9   | 2   | 1,4,5   | i | 2  | 0 | 0 | 0 | 0 | 0 | 0 | 0 |
| 9   | 5  | 9   | 2   | 1,4,5   | i | 2  | 0 | 0 | 0 | 0 | 0 | 0 | 0 |
| 9   | 5  | 9   | 2   | 1,4,5   | i | 2  | 0 | 0 | 0 | 0 | 0 | 0 | 0 |
| 9   | 5  | 9   | 2   | 1,4,5   | i | 2  | 0 | 0 | 0 | 0 | 0 | 0 | 0 |
| 9   | 5  | 9   | 2   | 4,5     | i | 2  | 0 | 0 | 0 | 0 | 0 | 0 | 0 |
| 125 | 84 | 9   | 101 | 3,10,15 | r | z6 | 0 | 0 | 0 | 0 | 0 | 0 | 0 |
| 9   | 5  | 9   | 2   | 4,5     | i | 2  | 0 | 0 | 0 | 0 | 1 | 0 | 0 |
| 9   | 5  | 9   | 2   | 4,5     | i | 2  | 0 | 0 | 0 | 0 | 1 | 0 | 0 |
| 77  | 64 | 64  | 67  | 8,20    | i | z6 | 0 | 0 | 0 | 0 | 0 | 0 | 0 |
| 77  | 64 | 64  | 67  | 8,20    | i | z6 | 0 | 0 | 0 | 0 | 0 | 0 | 0 |
| 77  | 64 | 64  | 67  | 8,20    | i | z6 | 0 | 0 | 0 | 0 | 0 | 0 | 0 |
| 77  | 64 | 64  | 67  | 8,20    | i | z6 | 1 | 0 | 0 | 0 | 0 | 0 | 0 |
| 77  | 64 | 64  | 67  | 8,20    | i | z6 | 1 | 0 | 0 | 0 | 0 | 0 | 0 |
| 9   | 5  | 9   | 2   | 4,5     | i | 2  | 0 | 0 | 0 | 0 | 0 | 0 | 0 |
| 9   | 5  | 9   | 2   | 4,5     | i | 2  | 0 | 0 | 0 | 0 | 0 | 0 | 0 |
| 77  | 64 | 64  | 67  | 8,20    | i | z6 | 0 | 0 | 0 | 0 | 0 | 0 | 0 |
| 77  | 64 | 64  | 67  | 8,20    | i | z6 | 0 | 0 | 0 | 0 | 0 | 0 | 0 |
| 9   | 5  | 9   | 2   | 4,5,12  | i |    | 0 | 0 | 0 | 0 | 0 | 0 | 0 |
| 9   | 5  | 9   | 2   | 4,5,12  | i |    | 0 | 0 | 0 | 0 | 0 | 0 | 0 |
| 9   | 5  | 9   | 2   | 4,5,12  | i |    | 0 | 0 | 0 | 0 | 0 | 0 | 0 |
| 9   | 5  | 9   | 2   | 4,5,12  | i |    | 0 | 0 | 0 | 0 | 0 | 0 | 0 |
| 9   | 5  | 9   | 2   | 4,5,12  | f |    | 0 | 0 | 0 | 0 | 0 | 0 | 0 |
| 9   | 5  | 9   | 2   | 4,5,12  | f |    | 0 | 0 | 0 | 0 | 0 | 0 | 0 |
| 156 | 64 | 151 | 87  | 6,7     | f |    | 0 | 0 | 0 | 0 | 0 | 0 | 0 |
| 4   | 3  | 3   | 7   | 4       | f | s  | 0 | 0 | 1 | 0 | 0 | 0 | 0 |

|     |     |    |     |        |                 |                 |   |   |   |   |   |   |   |
|-----|-----|----|-----|--------|-----------------|-----------------|---|---|---|---|---|---|---|
| 4   | 3   | 3  | 7   | 4      | f               | s               | 0 | 0 | 1 | 0 | 0 | 0 | 0 |
| 4   | 3   | 3  | 7   | 4      | f               | g,s             | 0 | 0 | 1 | 0 | 0 | 0 | 0 |
| 4   | 3   | 3  | 7   | 4,12   | f               | g,s             | 0 | 0 | 1 | 0 | 0 | 0 | 0 |
| 4   | 3   | 3  | 7   | 4,12   | f               | g,s             | 0 | 0 | 1 | 0 | 0 | 0 | 0 |
| 11  | 5   | 11 | 15  | 4,12   | z               | 1,7             | 0 | 0 | 0 | 0 | 0 | 0 | 1 |
| 11  | 5   | 11 | 15  | 4,12   | z               | 1,7             | 0 | 0 | 0 | 0 | 0 | 0 | 1 |
| 128 | 138 | 9  | 141 | 3,10   | e,h             | l,w             | 0 | 0 | 1 | 1 | 0 | 0 | 0 |
| 11  | 5   | 11 | -15 | 3,19   | z               | 1,7             | 0 | 0 | 1 | 1 | 0 | 0 | 1 |
| 7   | 6   | 6  | 11  | 9,12   | g,m             |                 | 0 | 0 | 0 | 0 | 0 | 0 | 0 |
| 7   | 6   | 6  | 11  | 9,12   | g,m             |                 | 0 | 0 | 0 | 0 | 0 | 0 | 0 |
| 11  | 5   | 11 | 15  | 1,4,12 | z               | 1,7             | 0 | 0 | 0 | 0 | 0 | 0 | 1 |
| 9   | 5   | 9  | 2   | 4,5    | i               | 2               | 0 | 1 | 0 | 0 | 1 | 0 | 0 |
| 11  | 5   | 11 | 15  | 4,12   | z               | 1,7             | 0 | 0 | 0 | 0 | 0 | 0 | 0 |
| 11  | 5   | 11 | 15  | 4,12   | z               | No agglutinator | 0 | 0 | 0 | 0 | 0 | 0 | 1 |
| 9   | 5   | 9  | 2   | 4,5,12 | i               | 1,2             | 0 | 0 | 0 | 0 | 1 | 0 | 0 |
| 11  | 5   | 11 | 15  | 4,12   | z               | 1,7             | 0 | 0 | 0 | 0 | 0 | 0 | 1 |
| 234 | 8   | 65 | 22  | 8,20   | z4              | z23             | 0 | 0 | 0 | 0 | 0 | 0 | 0 |
| 77  | 64  | 64 | 67  | 8,20   | i               | z6              | 0 | 0 | 0 | 0 | 0 | 0 | 0 |
| 78  | 113 | 6  | 68  | 6,7    | z10             | e,n,z15         | 0 | 0 | 0 | 0 | 0 | 0 | 0 |
| 234 | 8   | 65 | 22  | 8,20   | No agglutinator | No agglutinator | 0 | 0 | 0 | 1 | 0 | 0 | 0 |
| 234 | 8   | 65 | 22  | 8,20   | z4              | z23             | 0 | 0 | 0 | 0 | 0 | 0 | 0 |
| 77  | 64  | 64 | 67  | 8,20   | i               | z6              | 0 | 1 | 0 | 0 | 0 | 0 | 0 |
| 77  | 64  | 64 | 67  | 8,20   | i               | z6              | 0 | 0 | 0 | 0 | 0 | 0 | 0 |
| 234 | 8   | 65 | 22  | 8,20   | z4              | z23             | 0 | 0 | 0 | 0 | 0 | 0 | 0 |













|   |   |   |   |   |   |   |   |   |   |   |   |   |   |   |   |
|---|---|---|---|---|---|---|---|---|---|---|---|---|---|---|---|
| 0 | 0 | 1 | 0 | 0 | 0 | 0 | 0 | 0 | 0 | 0 | 0 | 0 | 0 | 0 | 0 |
| 0 | 0 | 1 | 0 | 0 | 0 | 0 | 0 | 0 | 0 | 0 | 0 | 0 | 0 | 0 | 0 |
| 0 | 0 | 1 | 0 | 0 | 0 | 0 | 0 | 0 | 0 | 0 | 0 | 0 | 0 | 0 | 0 |
| 0 | 0 | 1 | 0 | 0 | 0 | 0 | 0 | 0 | 0 | 0 | 0 | 0 | 0 | 0 | 0 |
| 0 | 0 | 0 | 1 | 0 | 0 | 0 | 0 | 0 | 0 | 1 | 0 | 0 | 0 | 0 | 0 |
| 0 | 0 | 0 | 1 | 0 | 0 | 0 | 0 | 0 | 0 | 1 | 0 | 0 | 0 | 0 | 0 |
| 0 | 0 | 1 | 0 | 0 | 0 | 0 | 0 | 0 | 0 | 0 | 0 | 0 | 0 | 0 | 0 |
| 0 | 0 | 1 | 1 | 0 | 0 | 0 | 0 | 0 | 0 | 1 | 0 | 0 | 0 | 0 | 0 |
| 0 | 0 | 1 | 0 | 0 | 0 | 0 | 0 | 1 | 0 | 0 | 0 | 0 | 0 | 0 | 0 |
| 0 | 0 | 1 | 0 | 0 | 0 | 0 | 0 | 1 | 0 | 0 | 0 | 0 | 0 | 0 | 0 |
| 0 | 0 | 0 | 1 | 0 | 0 | 0 | 0 | 0 | 0 | 1 | 0 | 0 | 0 | 0 | 0 |
| 0 | 0 | 1 | 0 | 0 | 0 | 0 | 0 | 0 | 0 | 0 | 0 | 0 | 0 | 0 | 0 |
| 0 | 0 | 1 | 1 | 0 | 0 | 0 | 0 | 0 | 0 | 1 | 0 | 0 | 0 | 0 | 0 |
| 0 | 0 | 0 | 1 | 0 | 0 | 0 | 0 | 0 | 0 | 1 | 0 | 0 | 0 | 0 | 0 |
| 0 | 0 | 1 | 0 | 0 | 0 | 0 | 0 | 0 | 0 | 1 | 0 | 0 | 0 | 0 | 0 |
| 0 | 0 | 0 | 1 | 0 | 0 | 0 | 0 | 0 | 0 | 1 | 0 | 0 | 0 | 0 | 0 |
| 0 | 0 | 1 | 0 | 0 | 0 | 0 | 0 | 0 | 0 | 0 | 0 | 0 | 0 | 0 | 0 |
| 1 | 0 | 1 | 0 | 0 | 0 | 0 | 0 | 0 | 1 | 0 | 0 | 0 | 0 | 0 | 0 |
| 0 | 0 | 1 | 0 | 0 | 0 | 0 | 0 | 0 | 0 | 0 | 1 | 0 | 0 | 0 | 1 |
| 0 | 0 | 1 | 0 | 0 | 0 | 0 | 1 | 0 | 0 | 0 | 0 | 1 | 0 | 0 | 1 |
| 0 | 0 | 1 | 0 | 0 | 0 | 0 | 0 | 0 | 0 | 0 | 0 | 0 | 0 | 0 | 0 |
| 1 | 0 | 1 | 0 | 0 | 0 | 0 | 0 | 0 | 0 | 0 | 0 | 0 | 0 | 0 | 0 |
| 1 | 0 | 1 | 0 | 0 | 0 | 1 | 0 | 0 | 1 | 0 | 0 | 0 | 0 | 0 | 0 |
| 0 | 0 | 1 | 0 | 0 | 0 | 0 | 0 | 0 | 0 | 0 | 1 | 0 | 0 | 0 | 1 |















| <i>oqxB</i> | <i>qnrB6</i> | <i>qnrS1</i> | <i>qnrS2</i> | <i>sul1</i> | <i>sul2</i> | <i>sul3</i>  | <i>tet(A)</i> | <i>tet(B)</i> | <i>tet(D)</i> | <i>tet(M)</i> | <i>ARR-3</i> | VFDB          | <i>cdtB</i> | <i>spvB</i> | <i>csgA</i> |             |             |
|-------------|--------------|--------------|--------------|-------------|-------------|--------------|---------------|---------------|---------------|---------------|--------------|---------------|-------------|-------------|-------------|-------------|-------------|
|             |              |              | sulphonamide |             |             | tetracycline |               |               |               | rifampicin    |              | Typhoid toxin |             | SpvB        | Agf/CsgA    |             |             |
| <i>oqxB</i> | <i>qnrB6</i> | <i>qnrS1</i> | <i>qnrS2</i> | <i>sul1</i> | <i>sul2</i> | <i>sul3</i>  | <i>tet(A)</i> | <i>tet(B)</i> | <i>tet(D)</i> | <i>tet(M)</i> | <i>ARR-3</i> | β             | NUM         | FO          | <i>cdtB</i> | <i>spvB</i> | <i>csgA</i> |
| 0           | 0            | 1            | 0            | 0           | 0           | 0            | 0             | 0             | 0             | 0             | 1            |               | 106         |             | 0           | 1           | 1           |
| 0           | 0            | 1            | 0            | 0           | 0           | 0            | 1             | 0             | 0             | 0             | 0            |               | 91          |             | 0           | 0           | 1           |
| 0           | 0            | 1            | 0            | 0           | 0           | 0            | 1             | 0             | 0             | 0             | 0            |               | 91          |             | 0           | 0           | 1           |
| 0           | 0            | 1            | 0            | 0           | 0           | 0            | 1             | 0             | 0             | 0             | 0            |               | 91          |             | 0           | 0           | 1           |
| 0           | 0            | 0            | 0            | 0           | 1           | 0            | 0             | 0             | 0             | 0             | 0            |               | 107         |             | 0           | 1           | 1           |
| 0           | 0            | 1            | 0            | 0           | 0           | 0            | 0             | 0             | 0             | 0             | 1            |               | 106         |             | 0           | 1           | 1           |
| 0           | 0            | 1            | 0            | 0           | 0           | 0            | 1             | 0             | 0             | 0             | 0            |               | 91          |             | 0           | 0           | 1           |
| 0           | 0            | 0            | 0            | 0           | 1           | 0            | 0             | 0             | 0             | 0             | 0            |               | 106         |             | 0           | 1           | 1           |
| 0           | 0            | 0            | 0            | 0           | 0           | 0            | 1             | 0             | 0             | 0             | 0            |               | 90          |             | 1           | 0           | 1           |
| 0           | 0            | 1            | 0            | 0           | 0           | 0            | 1             | 0             | 0             | 0             | 0            |               | 91          |             | 0           | 0           | 1           |
| 0           | 0            | 0            | 0            | 0           | 0           | 0            | 0             | 0             | 0             | 0             | 0            |               | 112         |             | 0           | 1           | 1           |
| 0           | 0            | 1            | 0            | 1           | 0           | 0            | 1             | 0             | 0             | 0             | 1            |               | 93          |             | 0           | 0           | 1           |
| 0           | 0            | 1            | 0            | 1           | 0           | 0            | 1             | 0             | 0             | 0             | 1            |               | 92          |             | 0           | 0           | 1           |
| 0           | 0            | 1            | 0            | 1           | 0           | 0            | 1             | 0             | 0             | 0             | 1            |               | 92          |             | 0           | 0           | 1           |
| 0           | 0            | 1            | 0            | 1           | 0           | 0            | 1             | 0             | 0             | 0             | 1            |               | 92          |             | 0           | 0           | 1           |
| 0           | 0            | 0            | 0            | 0           | 0           | 0            | 0             | 0             | 0             | 0             | 0            |               | 111         |             | 0           | 1           | 1           |
| 0           | 0            | 0            | 0            | 0           | 0           | 0            | 1             | 0             | 0             | 0             | 0            |               | 100         |             | 0           | 0           | 1           |
| 0           | 0            | 0            | 0            | 0           | 0           | 0            | 1             | 0             | 0             | 0             | 0            |               | 100         |             | 0           | 0           | 1           |
| 0           | 0            | 0            | 0            | 0           | 0           | 0            | 1             | 0             | 0             | 0             | 0            |               | 111         |             | 0           | 1           | 1           |
| 0           | 0            | 1            | 0            | 1           | 0           | 0            | 1             | 0             | 0             | 0             | 1            |               | 92          |             | 0           | 0           | 1           |
| 0           | 0            | 0            | 0            | 0           | 0           | 0            | 1             | 0             | 0             | 0             | 0            |               | 101         |             | 0           | 0           | 1           |
| 0           | 0            | 0            | 0            | 0           | 0           | 0            | 1             | 0             | 0             | 0             | 0            |               | 100         |             | 0           | 0           | 1           |
| 0           | 0            | 0            | 0            | 0           | 0           | 0            | 1             | 0             | 0             | 0             | 0            |               | 100         |             | 0           | 0           | 1           |
| 0           | 0            | 0            | 0            | 0           | 0           | 0            | 1             | 0             | 0             | 0             | 0            |               | 100         |             | 0           | 0           | 1           |
| 0           | 0            | 1            | 0            | 1           | 0           | 0            | 1             | 0             | 0             | 0             | 1            |               | 92          |             | 0           | 0           | 1           |
| 0           | 0            | 0            | 0            | 0           | 0           | 0            | 1             | 0             | 0             | 0             | 0            |               | 111         |             | 0           | 1           | 1           |
| 0           | 0            | 0            | 0            | 0           | 0           | 0            | 1             | 0             | 0             | 0             | 0            |               | 100         |             | 0           | 0           | 1           |
| 0           | 0            | 0            | 0            | 0           | 0           | 0            | 1             | 0             | 0             | 0             | 0            |               | 111         |             | 0           | 1           | 1           |
| 0           | 0            | 0            | 0            | 0           | 0           | 0            | 1             | 0             | 0             | 0             | 0            |               | 111         |             | 0           | 1           | 1           |
| 0           | 0            | 0            | 0            | 0           | 0           | 0            | 1             | 0             | 0             | 0             | 0            |               | 111         |             | 0           | 1           | 1           |
| 0           | 0            | 0            | 0            | 0           | 0           | 0            | 1             | 0             | 0             | 0             | 0            |               | 111         |             | 0           | 1           | 1           |
| 0           | 0            | 0            | 0            | 0           | 0           | 0            | 1             | 0             | 0             | 0             | 0            |               | 112         |             | 0           | 1           | 1           |
| 0           | 0            | 0            | 0            | 0           | 1           | 0            | 1             | 0             | 0             | 0             | 0            |               | 107         |             | 0           | 1           | 1           |
| 0           | 0            | 0            | 0            | 0           | 1           | 0            | 1             | 0             | 0             | 0             | 0            |               | 106         |             | 0           | 1           | 1           |
| 0           | 0            | 0            | 0            | 0           | 0           | 0            | 0             | 0             | 0             | 0             | 0            |               | 96          |             | 0           | 0           | 1           |
| 0           | 0            | 0            | 0            | 0           | 0           | 0            | 0             | 0             | 0             | 0             | 0            |               | 96          |             | 0           | 0           | 1           |
| 0           | 0            | 0            | 0            | 0           | 0           | 0            | 0             | 0             | 0             | 0             | 0            |               | 95          |             | 0           | 0           | 1           |
| 0           | 0            | 0            | 0            | 0           | 0           | 0            | 0             | 0             | 0             | 0             | 0            |               | 96          |             | 0           | 0           | 1           |

|   |   |   |   |   |   |   |   |   |   |   |   |     |   |   |   |
|---|---|---|---|---|---|---|---|---|---|---|---|-----|---|---|---|
| 0 | 0 | 0 | 0 | 0 | 0 | 0 | 0 | 0 | 0 | 0 | 0 | 95  | 0 | 0 | 1 |
| 0 | 0 | 0 | 0 | 0 | 0 | 0 | 0 | 0 | 0 | 0 | 0 | 96  | 0 | 0 | 1 |
| 0 | 0 | 0 | 0 | 0 | 0 | 0 | 0 | 0 | 0 | 0 | 0 | 96  | 0 | 0 | 1 |
| 0 | 0 | 0 | 0 | 0 | 0 | 0 | 0 | 0 | 0 | 0 | 0 | 95  | 0 | 0 | 1 |
| 0 | 0 | 0 | 0 | 0 | 0 | 0 | 0 | 0 | 0 | 0 | 0 | 96  | 0 | 0 | 1 |
| 0 | 0 | 0 | 0 | 0 | 0 | 0 | 0 | 0 | 0 | 0 | 0 | 95  | 0 | 0 | 1 |
| 0 | 0 | 0 | 0 | 0 | 0 | 0 | 0 | 0 | 0 | 0 | 0 | 95  | 0 | 0 | 1 |
| 0 | 0 | 0 | 0 | 0 | 0 | 0 | 0 | 0 | 0 | 0 | 0 | 94  | 0 | 0 | 1 |
| 0 | 0 | 0 | 0 | 0 | 0 | 0 | 0 | 0 | 0 | 0 | 0 | 95  | 0 | 0 | 1 |
| 0 | 0 | 0 | 0 | 0 | 0 | 0 | 0 | 0 | 0 | 0 | 0 | 96  | 0 | 0 | 1 |
| 0 | 0 | 0 | 0 | 0 | 0 | 0 | 0 | 0 | 0 | 0 | 0 | 96  | 0 | 0 | 1 |
| 0 | 0 | 0 | 0 | 0 | 0 | 0 | 0 | 0 | 0 | 0 | 0 | 96  | 0 | 0 | 1 |
| 0 | 0 | 1 | 0 | 1 | 0 | 0 | 1 | 0 | 0 | 0 | 1 | 92  | 0 | 0 | 1 |
| 0 | 0 | 1 | 0 | 1 | 0 | 0 | 1 | 0 | 0 | 0 | 1 | 92  | 0 | 0 | 1 |
| 0 | 0 | 1 | 0 | 1 | 0 | 0 | 1 | 0 | 0 | 0 | 1 | 92  | 0 | 0 | 1 |
| 0 | 0 | 1 | 0 | 1 | 0 | 0 | 1 | 0 | 0 | 0 | 1 | 92  | 0 | 0 | 1 |
| 0 | 0 | 1 | 0 | 1 | 0 | 0 | 1 | 0 | 0 | 0 | 1 | 92  | 0 | 0 | 1 |
| 0 | 0 | 1 | 0 | 1 | 0 | 0 | 1 | 0 | 0 | 0 | 1 | 92  | 0 | 0 | 1 |
| 0 | 0 | 0 | 0 | 1 | 1 | 0 | 0 | 1 | 0 | 0 | 1 | 102 | 0 | 0 | 1 |
| 0 | 0 | 0 | 0 | 1 | 1 | 0 | 0 | 1 | 0 | 0 | 1 | 102 | 0 | 0 | 1 |
| 0 | 0 | 0 | 0 | 1 | 1 | 0 | 0 | 1 | 0 | 0 | 1 | 102 | 0 | 0 | 1 |
| 0 | 0 | 0 | 0 | 1 | 1 | 0 | 0 | 1 | 0 | 0 | 1 | 102 | 0 | 0 | 1 |
| 0 | 0 | 0 | 0 | 0 | 0 | 0 | 0 | 0 | 0 | 0 | 0 | 96  | 0 | 0 | 1 |
| 0 | 0 | 0 | 0 | 0 | 0 | 0 | 1 | 0 | 0 | 0 | 0 | 111 | 0 | 1 | 1 |
| 0 | 0 | 0 | 0 | 0 | 0 | 0 | 1 | 0 | 0 | 0 | 0 | 111 | 0 | 1 | 1 |
| 0 | 0 | 1 | 0 | 1 | 0 | 0 | 1 | 0 | 0 | 0 | 1 | 92  | 0 | 0 | 1 |
| 0 | 0 | 1 | 0 | 1 | 0 | 0 | 1 | 0 | 0 | 0 | 1 | 92  | 0 | 0 | 1 |
| 0 | 0 | 1 | 0 | 1 | 0 | 0 | 1 | 0 | 0 | 0 | 1 | 92  | 0 | 0 | 1 |
| 0 | 0 | 1 | 0 | 1 | 0 | 0 | 1 | 0 | 0 | 0 | 1 | 92  | 0 | 0 | 1 |
| 0 | 0 | 0 | 0 | 1 | 1 | 0 | 0 | 1 | 0 | 0 | 1 | 102 | 0 | 0 | 1 |
| 0 | 0 | 0 | 0 | 1 | 1 | 0 | 0 | 1 | 0 | 0 | 1 | 102 | 0 | 0 | 1 |
| 0 | 0 | 0 | 0 | 1 | 1 | 0 | 0 | 1 | 0 | 0 | 1 | 102 | 0 | 0 | 1 |
| 0 | 0 | 1 | 0 | 1 | 0 | 0 | 1 | 0 | 0 | 0 | 1 | 92  | 0 | 0 | 1 |
| 0 | 0 | 1 | 0 | 1 | 0 | 0 | 1 | 0 | 0 | 0 | 1 | 92  | 0 | 0 | 1 |
| 1 | 0 | 0 | 0 | 1 | 1 | 1 | 0 | 1 | 0 | 0 | 1 | 102 | 0 | 0 | 1 |
| 1 | 0 | 0 | 0 | 1 | 1 | 1 | 0 | 1 | 0 | 0 | 1 | 102 | 0 | 0 | 1 |
| 1 | 0 | 0 | 0 | 1 | 1 | 1 | 0 | 1 | 0 | 0 | 1 | 102 | 0 | 0 | 1 |
| 1 | 0 | 0 | 0 | 1 | 0 | 0 | 0 | 1 | 0 | 0 | 0 | 103 | 0 | 0 | 1 |
| 1 | 0 | 0 | 0 | 1 | 1 | 1 | 0 | 1 | 0 | 0 | 1 | 102 | 0 | 0 | 1 |
| 1 | 0 | 0 | 0 | 1 | 1 | 1 | 0 | 1 | 0 | 0 | 1 | 102 | 0 | 0 | 1 |
| 0 | 0 | 1 | 0 | 0 | 1 | 0 | 1 | 0 | 0 | 1 | 0 | 91  | 0 | 0 | 1 |
| 0 | 0 | 1 | 0 | 0 | 0 | 0 | 1 | 0 | 0 | 0 | 0 | 92  | 0 | 0 | 1 |

|   |   |   |   |   |   |   |   |   |   |   |   |     |   |   |   |
|---|---|---|---|---|---|---|---|---|---|---|---|-----|---|---|---|
| 0 | 0 | 1 | 0 | 0 | 0 | 0 | 1 | 0 | 0 | 0 | 0 | 92  | 0 | 0 | 1 |
| 0 | 0 | 1 | 0 | 0 | 0 | 0 | 1 | 0 | 0 | 0 | 0 | 92  | 0 | 0 | 1 |
| 0 | 0 | 1 | 0 | 0 | 0 | 0 | 1 | 0 | 0 | 0 | 0 | 92  | 0 | 0 | 1 |
| 0 | 0 | 1 | 0 | 0 | 0 | 0 | 1 | 0 | 0 | 0 | 0 | 92  | 0 | 0 | 1 |
| 0 | 0 | 0 | 0 | 1 | 0 | 0 | 1 | 0 | 0 | 0 | 1 | 89  | 1 | 0 | 1 |
| 0 | 0 | 0 | 0 | 1 | 0 | 0 | 1 | 0 | 0 | 0 | 1 | 89  | 1 | 0 | 1 |
| 1 | 0 | 1 | 0 | 0 | 0 | 0 | 0 | 0 | 0 | 0 | 0 | 90  | 0 | 0 | 1 |
| 1 | 0 | 1 | 0 | 1 | 0 | 0 | 1 | 0 | 0 | 0 | 1 | 80  | 1 | 0 | 1 |
| 0 | 0 | 0 | 0 | 0 | 0 | 0 | 0 | 0 | 0 | 0 | 0 | 100 | 0 | 0 | 1 |
| 0 | 0 | 0 | 0 | 0 | 0 | 0 | 0 | 0 | 0 | 0 | 0 | 100 | 0 | 0 | 1 |
| 0 | 0 | 0 | 0 | 1 | 0 | 0 | 1 | 0 | 0 | 0 | 1 | 89  | 1 | 0 | 1 |
| 0 | 0 | 0 | 0 | 0 | 0 | 0 | 0 | 0 | 0 | 0 | 0 | 112 | 0 | 1 | 1 |
| 0 | 0 | 0 | 0 | 1 | 0 | 0 | 0 | 0 | 0 | 0 | 1 | 89  | 1 | 0 | 1 |
| 0 | 0 | 0 | 0 | 1 | 0 | 0 | 1 | 0 | 0 | 0 | 1 | 89  | 1 | 0 | 1 |
| 0 | 0 | 1 | 0 | 0 | 0 | 0 | 0 | 0 | 0 | 0 | 1 | 106 | 0 | 1 | 1 |
| 0 | 0 | 0 | 0 | 1 | 0 | 0 | 1 | 0 | 0 | 0 | 1 | 89  | 1 | 0 | 1 |
| 0 | 0 | 1 | 0 | 0 | 0 | 0 | 1 | 0 | 0 | 0 | 0 | 90  | 0 | 0 | 1 |
| 0 | 0 | 0 | 0 | 1 | 0 | 0 | 1 | 0 | 0 | 0 | 1 | 92  | 0 | 0 | 1 |
| 0 | 0 | 1 | 0 | 0 | 1 | 0 | 1 | 0 | 0 | 0 | 0 | 92  | 0 | 0 | 1 |
| 1 | 0 | 1 | 0 | 1 | 1 | 0 | 1 | 0 | 0 | 0 | 0 | 89  | 0 | 0 | 1 |
| 0 | 0 | 1 | 0 | 0 | 0 | 0 | 1 | 0 | 0 | 0 | 0 | 89  | 0 | 0 | 1 |
| 0 | 0 | 0 | 0 | 0 | 0 | 0 | 0 | 0 | 0 | 0 | 1 | 92  | 0 | 0 | 1 |
| 0 | 0 | 0 | 0 | 1 | 0 | 0 | 1 | 0 | 0 | 0 | 1 | 92  | 0 | 0 | 1 |
| 0 | 0 | 1 | 0 | 0 | 1 | 0 | 1 | 0 | 0 | 0 | 0 | 89  | 0 | 0 | 1 |







| <i>steA</i> | <i>steB</i>    | <i>steC</i> | <i>mgtB</i> | <i>mgtC</i> | <i>rck</i> | <i>sodCI</i> | <i>mig-14</i> | <i>sinH</i> | <i>shdA</i> | <i>ratB</i> | <i>misL</i> | <i>gogB</i>          | <i>spvC</i> | <i>spvR</i> | <i>sifA</i> | <i>sifB</i> | <i>sseF</i> |
|-------------|----------------|-------------|-------------|-------------|------------|--------------|---------------|-------------|-------------|-------------|-------------|----------------------|-------------|-------------|-------------|-------------|-------------|
| Ste         | Mg2+ transport |             |             |             | <i>rck</i> | <i>SodCI</i> | <i>Mig-14</i> | <i>sinH</i> | <i>ShdA</i> | <i>ratB</i> | <i>MisL</i> | anslocated effectors |             |             |             |             |             |
| <i>steA</i> | <i>steB</i>    | <i>steC</i> | <i>mgtB</i> | <i>mgtC</i> | <i>rck</i> | <i>sodCI</i> | <i>mig-14</i> | <i>sinH</i> | <i>shdA</i> | <i>ratB</i> | <i>misL</i> | <i>gogB</i>          | <i>spvC</i> | <i>spvR</i> | <i>sifA</i> | <i>sifB</i> | <i>sseF</i> |
| 1           | 1              | 1           | 1           | 1           | 0          | 1            | 1             | 1           | 0           | 1           | 1           | 1                    | 1           | 1           | 1           | 1           | 1           |
| 0           | 1              | 1           | 1           | 1           | 0          | 0            | 1             | 1           | 0           | 0           | 1           | 0                    | 0           | 0           | 1           | 1           | 1           |
| 0           | 1              | 1           | 1           | 1           | 0          | 0            | 1             | 1           | 0           | 0           | 1           | 0                    | 0           | 0           | 1           | 1           | 1           |
| 0           | 1              | 1           | 1           | 1           | 0          | 0            | 1             | 1           | 0           | 0           | 1           | 0                    | 0           | 0           | 1           | 1           | 1           |
| 1           | 1              | 1           | 1           | 1           | 1          | 1            | 1             | 1           | 1           | 1           | 1           | 0                    | 1           | 1           | 1           | 1           | 1           |
| 1           | 1              | 1           | 1           | 1           | 0          | 1            | 1             | 1           | 0           | 1           | 1           | 1                    | 1           | 1           | 1           | 1           | 1           |
| 0           | 1              | 1           | 1           | 1           | 0          | 0            | 1             | 1           | 0           | 0           | 1           | 0                    | 0           | 0           | 1           | 1           | 1           |
| 1           | 1              | 1           | 1           | 1           | 1          | 1            | 1             | 1           | 0           | 1           | 1           | 0                    | 1           | 1           | 1           | 1           | 1           |
| 1           | 1              | 1           | 1           | 1           | 0          | 0            | 1             | 1           | 0           | 0           | 1           | 0                    | 0           | 0           | 1           | 1           | 1           |
| 0           | 1              | 1           | 1           | 1           | 0          | 0            | 1             | 1           | 0           | 0           | 1           | 0                    | 0           | 0           | 1           | 1           | 1           |
| 0           | 1              | 1           | 1           | 1           | 0          | 0            | 1             | 1           | 0           | 0           | 1           | 0                    | 0           | 0           | 1           | 1           | 1           |
| 0           | 1              | 1           | 1           | 1           | 0          | 0            | 1             | 1           | 0           | 0           | 1           | 0                    | 0           | 0           | 1           | 1           | 1           |
| 0           | 1              | 1           | 1           | 1           | 0          | 0            | 1             | 1           | 0           | 0           | 1           | 0                    | 0           | 0           | 1           | 1           | 1           |
| 1           | 1              | 1           | 1           | 1           | 1          | 1            | 1             | 1           | 0           | 1           | 1           | 1                    | 1           | 1           | 1           | 1           | 1           |
| 1           | 1              | 1           | 1           | 1           | 0          | 1            | 1             | 1           | 0           | 1           | 1           | 0                    | 0           | 0           | 1           | 1           | 1           |
| 1           | 1              | 1           | 1           | 1           | 0          | 1            | 1             | 1           | 0           | 1           | 1           | 0                    | 0           | 0           | 1           | 1           | 1           |
| 1           | 1              | 1           | 1           | 1           | 1          | 1            | 1             | 1           | 0           | 1           | 1           | 1                    | 1           | 1           | 1           | 1           | 1           |
| 0           | 1              | 1           | 1           | 1           | 0          | 0            | 1             | 1           | 0           | 0           | 1           | 0                    | 0           | 0           | 1           | 1           | 1           |
| 1           | 1              | 1           | 1           | 1           | 0          | 1            | 1             | 1           | 1           | 1           | 1           | 0                    | 0           | 0           | 1           | 1           | 1           |
| 1           | 1              | 1           | 1           | 1           | 0          | 1            | 1             | 1           | 0           | 1           | 1           | 0                    | 0           | 0           | 1           | 1           | 1           |
| 1           | 1              | 1           | 1           | 1           | 0          | 1            | 1             | 1           | 0           | 1           | 1           | 0                    | 0           | 0           | 1           | 1           | 1           |
| 1           | 1              | 1           | 1           | 1           | 0          | 1            | 1             | 1           | 0           | 1           | 1           | 0                    | 0           | 0           | 1           | 1           | 1           |
| 0           | 1              | 1           | 1           | 1           | 0          | 0            | 1             | 1           | 0           | 0           | 1           | 0                    | 0           | 0           | 1           | 1           | 1           |
| 1           | 1              | 1           | 1           | 1           | 1          | 1            | 1             | 1           | 0           | 1           | 1           | 1                    | 1           | 1           | 1           | 1           | 1           |
| 1           | 1              | 1           | 1           | 1           | 0          | 1            | 1             | 1           | 0           | 1           | 1           | 0                    | 0           | 0           | 1           | 1           | 1           |
| 1           | 1              | 1           | 1           | 1           | 1          | 1            | 1             | 1           | 0           | 1           | 1           | 1                    | 1           | 1           | 1           | 1           | 1           |
| 1           | 1              | 1           | 1           | 1           | 1          | 1            | 1             | 1           | 0           | 1           | 1           | 1                    | 1           | 1           | 1           | 1           | 1           |
| 1           | 1              | 1           | 1           | 1           | 1          | 1            | 1             | 1           | 1           | 1           | 1           | 1                    | 1           | 1           | 1           | 1           | 1           |
| 1           | 1              | 1           | 1           | 1           | 1          | 1            | 1             | 1           | 1           | 1           | 1           | 0                    | 1           | 1           | 1           | 1           | 1           |
| 1           | 1              | 1           | 1           | 1           | 1          | 1            | 1             | 1           | 0           | 1           | 1           | 0                    | 1           | 1           | 1           | 1           | 1           |
| 1           | 1              | 1           | 1           | 1           | 0          | 1            | 1             | 1           | 0           | 1           | 1           | 0                    | 0           | 0           | 1           | 1           | 1           |
| 1           | 1              | 1           | 1           | 1           | 0          | 1            | 1             | 1           | 0           | 1           | 1           | 0                    | 0           | 0           | 1           | 1           | 1           |
| 1           | 1              | 1           | 1           | 1           | 0          | 1            | 1             | 1           | 0           | 1           | 1           | 0                    | 0           | 0           | 1           | 1           | 1           |
| 1           | 1              | 1           | 1           | 1           | 0          | 1            | 1             | 1           | 0           | 1           | 1           | 0                    | 0           | 0           | 1           | 1           | 1           |





|   |   |   |   |   |   |   |   |   |   |   |   |   |   |   |   |   |   |
|---|---|---|---|---|---|---|---|---|---|---|---|---|---|---|---|---|---|
| 0 | 1 | 1 | 1 | 1 | 0 | 0 | 1 | 1 | 0 | 0 | 1 | 0 | 0 | 0 | 1 | 1 | 1 |
| 0 | 1 | 1 | 1 | 1 | 0 | 0 | 1 | 1 | 0 | 0 | 1 | 0 | 0 | 0 | 1 | 1 | 1 |
| 0 | 1 | 1 | 1 | 1 | 0 | 0 | 1 | 1 | 0 | 0 | 1 | 0 | 0 | 0 | 1 | 1 | 1 |
| 0 | 1 | 1 | 1 | 1 | 0 | 0 | 1 | 1 | 0 | 0 | 1 | 0 | 0 | 0 | 1 | 1 | 1 |
| 1 | 1 | 1 | 1 | 1 | 0 | 0 | 0 | 1 | 0 | 0 | 1 | 0 | 0 | 0 | 1 | 1 | 1 |
| 1 | 1 | 1 | 1 | 1 | 0 | 0 | 0 | 1 | 0 | 0 | 1 | 0 | 0 | 0 | 1 | 1 | 1 |
| 0 | 1 | 1 | 1 | 1 | 0 | 0 | 1 | 1 | 0 | 0 | 1 | 0 | 0 | 0 | 1 | 1 | 1 |
| 1 | 1 | 0 | 1 | 1 | 0 | 0 | 1 | 0 | 0 | 0 | 0 | 0 | 0 | 0 | 0 | 1 | 1 |
| 1 | 1 | 1 | 1 | 1 | 0 | 1 | 1 | 1 | 0 | 1 | 1 | 0 | 0 | 0 | 1 | 1 | 1 |
| 1 | 1 | 1 | 1 | 1 | 0 | 1 | 1 | 1 | 0 | 1 | 1 | 0 | 0 | 0 | 1 | 1 | 1 |
| 1 | 1 | 1 | 1 | 1 | 0 | 0 | 0 | 1 | 0 | 0 | 1 | 0 | 0 | 0 | 1 | 1 | 1 |
| 1 | 1 | 1 | 1 | 1 | 1 | 1 | 1 | 1 | 1 | 1 | 1 | 1 | 1 | 1 | 1 | 1 | 1 |
| 1 | 1 | 1 | 1 | 1 | 0 | 0 | 0 | 1 | 0 | 0 | 1 | 0 | 0 | 0 | 1 | 1 | 1 |
| 1 | 1 | 1 | 1 | 1 | 0 | 0 | 0 | 1 | 0 | 0 | 1 | 0 | 0 | 0 | 1 | 1 | 1 |
| 1 | 1 | 1 | 1 | 1 | 0 | 1 | 1 | 1 | 0 | 1 | 1 | 1 | 1 | 1 | 1 | 1 | 1 |
| 1 | 1 | 1 | 1 | 1 | 0 | 0 | 0 | 1 | 0 | 0 | 1 | 0 | 0 | 0 | 1 | 1 | 1 |
| 1 | 1 | 1 | 1 | 1 | 0 | 0 | 1 | 1 | 1 | 0 | 1 | 0 | 0 | 0 | 0 | 1 | 1 |
| 0 | 1 | 1 | 1 | 1 | 0 | 0 | 1 | 1 | 0 | 0 | 1 | 0 | 0 | 0 | 1 | 1 | 1 |
| 0 | 1 | 1 | 1 | 1 | 0 | 0 | 1 | 1 | 0 | 0 | 1 | 0 | 0 | 0 | 1 | 1 | 1 |
| 1 | 1 | 1 | 1 | 1 | 0 | 0 | 1 | 1 | 0 | 0 | 1 | 0 | 0 | 0 | 0 | 1 | 1 |
| 0 | 1 | 1 | 1 | 1 | 0 | 0 | 1 | 1 | 0 | 0 | 1 | 0 | 0 | 0 | 1 | 1 | 1 |
| 0 | 1 | 1 | 1 | 1 | 0 | 0 | 1 | 1 | 0 | 0 | 1 | 0 | 0 | 0 | 1 | 1 | 1 |
| 1 | 1 | 1 | 1 | 1 | 0 | 0 | 1 | 1 | 0 | 0 | 1 | 0 | 0 | 0 | 0 | 1 | 1 |





















| <i>ssaR</i> | <i>ssaS</i> | <i>ssaT</i> | <i>ssaU</i> | <i>ssaV</i> | <i>sscA</i> | <i>sscB</i> | <i>sseA</i> | <i>sseB</i> | <i>sseC</i> | <i>sseD</i> | <i>sseE</i> | <i>papB</i> | <i>papI</i> | <i>grvA</i> | Ampicillin | Amoxicillin |
|-------------|-------------|-------------|-------------|-------------|-------------|-------------|-------------|-------------|-------------|-------------|-------------|-------------|-------------|-------------|------------|-------------|
| <i>ssaR</i> | <i>ssaS</i> | <i>ssaT</i> | <i>ssaU</i> | <i>ssaV</i> | <i>sscA</i> | <i>sscB</i> | <i>sseA</i> | <i>sseB</i> | <i>sseC</i> | <i>sseD</i> | <i>sseE</i> | <i>papB</i> | <i>papI</i> | <i>grvA</i> | Ampicillin | Amoxicillin |
| 1           | 1           | 1           | 1           | 1           | 1           | 1           | 1           | 1           | 1           | 1           | 1           | 0           | 0           | 1           | > 512      | 8/4         |
| 1           | 1           | 1           | 1           | 1           | 1           | 1           | 1           | 1           | 1           | 1           | 1           | 0           | 0           | 0           | 1          | 1/0.5       |
| 1           | 1           | 1           | 1           | 1           | 1           | 1           | 1           | 1           | 1           | 1           | 1           | 0           | 0           | 0           | 1          | 1/0.5       |
| 1           | 1           | 1           | 1           | 1           | 1           | 1           | 1           | 1           | 1           | 1           | 1           | 0           | 0           | 0           | 1          | 0.5/0.25    |
| 1           | 1           | 1           | 1           | 1           | 1           | 1           | 1           | 1           | 1           | 1           | 1           | 0           | 0           | 0           | > 512      | 8/4         |
| 1           | 1           | 1           | 1           | 1           | 1           | 1           | 1           | 1           | 1           | 1           | 1           | 0           | 0           | 1           | > 512      | 16/8        |
| 1           | 1           | 1           | 1           | 1           | 1           | 1           | 1           | 1           | 1           | 1           | 1           | 0           | 0           | 0           | 1          | 1/0.5       |
| 1           | 1           | 1           | 1           | 1           | 1           | 1           | 1           | 1           | 1           | 1           | 1           | 0           | 0           | 0           | > 512      | 16/8        |
| 1           | 1           | 1           | 1           | 1           | 1           | 1           | 1           | 1           | 1           | 1           | 1           | 0           | 0           | 0           | 1          | 0.5/0.25    |
| 1           | 1           | 1           | 1           | 1           | 1           | 1           | 1           | 1           | 1           | 1           | 1           | 0           | 0           | 0           | 1          | 0.5/0.25    |
| 1           | 1           | 1           | 1           | 1           | 1           | 1           | 1           | 1           | 1           | 1           | 1           | 0           | 0           | 1           | 1          | 1/0.5       |
| 1           | 1           | 1           | 1           | 1           | 1           | 1           | 1           | 1           | 1           | 1           | 1           | 0           | 0           | 0           | 512        | 32/16       |
| 1           | 1           | 1           | 1           | 1           | 1           | 1           | 1           | 1           | 1           | 1           | 1           | 0           | 0           | 0           | > 512      | 8/4         |
| 1           | 1           | 1           | 1           | 1           | 1           | 1           | 1           | 1           | 1           | 1           | 1           | 0           | 0           | 0           | > 512      | 8/4         |
| 1           | 1           | 1           | 1           | 1           | 1           | 1           | 1           | 1           | 1           | 1           | 1           | 0           | 0           | 0           | > 512      | 8/4         |
| 1           | 1           | 1           | 1           | 1           | 1           | 1           | 1           | 1           | 1           | 1           | 1           | 0           | 0           | 1           | > 512      | 16/8        |
| 1           | 1           | 1           | 1           | 1           | 1           | 1           | 1           | 1           | 1           | 1           | 1           | 0           | 0           | 0           | > 512      | 8/4         |
| 1           | 1           | 1           | 1           | 1           | 1           | 1           | 1           | 1           | 1           | 1           | 1           | 0           | 0           | 0           | 1          | 0.5/0.25    |
| 1           | 1           | 1           | 1           | 1           | 1           | 1           | 1           | 1           | 1           | 1           | 1           | 0           | 0           | 1           | > 512      | 16/8        |
| 1           | 1           | 1           | 1           | 1           | 1           | 1           | 1           | 1           | 1           | 1           | 1           | 0           | 0           | 0           | > 512      | 16/8        |
| 1           | 1           | 1           | 1           | 1           | 1           | 1           | 1           | 1           | 1           | 1           | 1           | 0           | 0           | 0           | > 512      | 16/8        |
| 1           | 1           | 1           | 1           | 1           | 1           | 1           | 1           | 1           | 1           | 1           | 1           | 0           | 0           | 0           | > 512      | 8/4         |
| 1           | 1           | 1           | 1           | 1           | 1           | 1           | 1           | 1           | 1           | 1           | 1           | 0           | 0           | 0           | > 512      | 16/8        |
| 1           | 1           | 1           | 1           | 1           | 1           | 1           | 1           | 1           | 1           | 1           | 1           | 0           | 0           | 0           | > 512      | 8/4         |
| 1           | 1           | 1           | 1           | 1           | 1           | 1           | 1           | 1           | 1           | 1           | 1           | 0           | 0           | 0           | > 512      | 8/4         |
| 1           | 1           | 1           | 1           | 1           | 1           | 1           | 1           | 1           | 1           | 1           | 1           | 0           | 0           | 0           | > 512      | 16/8        |
| 1           | 1           | 1           | 1           | 1           | 1           | 1           | 1           | 1           | 1           | 1           | 1           | 0           | 0           | 1           | > 512      | 8/4         |
| 1           | 1           | 1           | 1           | 1           | 1           | 1           | 1           | 1           | 1           | 1           | 1           | 0           | 0           | 0           | > 512      | 8/4         |
| 1           | 1           | 1           | 1           | 1           | 1           | 1           | 1           | 1           | 1           | 1           | 1           | 0           | 0           | 1           | 512        | 8/4         |
| 1           | 1           | 1           | 1           | 1           | 1           | 1           | 1           | 1           | 1           | 1           | 1           | 0           | 0           | 1           | 256        | 8/4         |
| 1           | 1           | 1           | 1           | 1           | 1           | 1           | 1           | 1           | 1           | 1           | 1           | 0           | 0           | 1           | 512        | 8/4         |
| 1           | 1           | 1           | 1           | 1           | 1           | 1           | 1           | 1           | 1           | 1           | 1           | 0           | 0           | 1           | 512        | 8/4         |
| 1           | 1           | 1           | 1           | 1           | 1           | 1           | 1           | 1           | 1           | 1           | 1           | 0           | 0           | 0           | 4          | 8/4         |
| 1           | 1           | 1           | 1           | 1           | 1           | 1           | 1           | 1           | 1           | 1           | 1           | 0           | 0           | 1           | > 512      | 16/8        |
| 1           | 1           | 1           | 1           | 1           | 1           | 1           | 1           | 1           | 1           | 1           | 1           | 0           | 0           | 1           | > 512      | 8/4         |
| 1           | 1           | 1           | 1           | 1           | 1           | 1           | 1           | 1           | 1           | 1           | 1           | 0           | 0           | 1           | 0.5        | 1/0.5       |
| 1           | 1           | 1           | 1           | 1           | 1           | 1           | 1           | 1           | 1           | 1           | 1           | 0           | 0           | 1           | 1          | 2/1         |

|   |   |   |   |   |   |   |   |   |   |   |   |   |   |   |       |          |
|---|---|---|---|---|---|---|---|---|---|---|---|---|---|---|-------|----------|
| 1 | 1 | 1 | 1 | 1 | 1 | 1 | 1 | 1 | 1 | 1 | 1 | 0 | 0 | 1 | 1     | 0.5/0.25 |
| 1 | 1 | 1 | 1 | 1 | 1 | 1 | 1 | 1 | 1 | 1 | 1 | 0 | 0 | 1 | 1     | 0.5/0.25 |
| 1 | 1 | 1 | 1 | 1 | 1 | 1 | 1 | 1 | 1 | 1 | 1 | 0 | 0 | 1 | 1     | 0.5/0.25 |
| 1 | 1 | 1 | 1 | 1 | 1 | 1 | 1 | 1 | 1 | 1 | 1 | 0 | 0 | 1 | 1     | 0.5/0.25 |
| 1 | 1 | 1 | 1 | 1 | 1 | 1 | 1 | 1 | 1 | 1 | 1 | 0 | 0 | 1 | > 512 | 8/4      |
| 1 | 1 | 1 | 1 | 1 | 1 | 1 | 1 | 1 | 1 | 1 | 1 | 0 | 0 | 1 | 1     | 0.5/0.25 |
| 1 | 1 | 1 | 1 | 1 | 1 | 1 | 1 | 1 | 1 | 1 | 1 | 0 | 0 | 1 | 1     | 0.5/0.25 |
| 1 | 1 | 1 | 1 | 1 | 1 | 1 | 1 | 1 | 1 | 1 | 1 | 0 | 0 | 1 | 1     | 0.5/0.25 |
| 1 | 1 | 1 | 1 | 1 | 1 | 1 | 1 | 1 | 1 | 1 | 1 | 0 | 0 | 1 | 0.5   | 0.5/0.25 |
| 1 | 1 | 1 | 1 | 1 | 1 | 1 | 1 | 1 | 1 | 1 | 1 | 0 | 0 | 1 | 1     | 2/1      |
| 1 | 1 | 1 | 1 | 1 | 1 | 1 | 1 | 1 | 1 | 1 | 1 | 0 | 0 | 1 | 1     | 1/0.5    |
| 1 | 1 | 1 | 1 | 1 | 1 | 1 | 1 | 1 | 1 | 1 | 1 | 0 | 0 | 1 | 1     | 0.5/0.25 |
| 1 | 1 | 1 | 1 | 1 | 1 | 1 | 1 | 1 | 1 | 1 | 1 | 0 | 0 | 0 | > 512 | 8/4      |
| 1 | 1 | 1 | 1 | 1 | 1 | 1 | 1 | 1 | 1 | 1 | 1 | 0 | 0 | 0 | > 512 | 8/4      |
| 1 | 1 | 1 | 1 | 1 | 1 | 1 | 1 | 1 | 1 | 1 | 1 | 0 | 0 | 0 | > 512 | 8/4      |
| 1 | 1 | 1 | 1 | 1 | 1 | 1 | 1 | 1 | 1 | 1 | 1 | 0 | 0 | 0 | > 512 | 8/4      |
| 1 | 1 | 1 | 1 | 1 | 1 | 1 | 1 | 1 | 1 | 1 | 1 | 0 | 0 | 0 | > 512 | 8/4      |
| 1 | 1 | 1 | 1 | 1 | 1 | 1 | 1 | 1 | 1 | 1 | 1 | 0 | 0 | 0 | > 512 | 8/4      |
| 1 | 1 | 1 | 1 | 1 | 1 | 1 | 1 | 1 | 1 | 1 | 1 | 0 | 0 | 0 | 128   | 8/4      |
| 1 | 1 | 1 | 1 | 1 | 1 | 1 | 1 | 1 | 1 | 1 | 1 | 0 | 0 | 0 | 128   | 16/8     |
| 1 | 1 | 1 | 1 | 1 | 1 | 1 | 1 | 1 | 1 | 1 | 1 | 0 | 0 | 0 | 256   | 16/8     |
| 1 | 1 | 1 | 1 | 1 | 1 | 1 | 1 | 1 | 1 | 1 | 1 | 0 | 0 | 0 | 512   | 16/8     |
| 1 | 1 | 1 | 1 | 1 | 1 | 1 | 1 | 1 | 1 | 1 | 1 | 0 | 0 | 0 | 128   | 16/8     |
| 1 | 1 | 1 | 1 | 1 | 1 | 1 | 1 | 1 | 1 | 1 | 1 | 0 | 0 | 1 | 1     | 2/1      |
| 1 | 1 | 1 | 1 | 1 | 1 | 1 | 1 | 1 | 1 | 1 | 1 | 0 | 0 | 1 | 256   | 4/2      |
| 1 | 1 | 1 | 1 | 1 | 1 | 1 | 1 | 1 | 1 | 1 | 1 | 0 | 0 | 1 | 256   | 4/2      |
| 1 | 1 | 1 | 1 | 1 | 1 | 1 | 1 | 1 | 1 | 1 | 1 | 0 | 0 | 0 | > 512 | 8/4      |
| 1 | 1 | 1 | 1 | 1 | 1 | 1 | 1 | 1 | 1 | 1 | 1 | 0 | 0 | 0 | > 512 | 8/4      |
| 1 | 1 | 1 | 1 | 1 | 1 | 1 | 1 | 1 | 1 | 1 | 1 | 0 | 0 | 0 | > 512 | 8/4      |
| 1 | 1 | 1 | 1 | 1 | 1 | 1 | 1 | 1 | 1 | 1 | 1 | 0 | 0 | 0 | > 512 | 8/4      |
| 1 | 1 | 1 | 1 | 1 | 1 | 1 | 1 | 1 | 1 | 1 | 1 | 0 | 0 | 0 | > 512 | 8/4      |
| 1 | 1 | 1 | 1 | 1 | 1 | 1 | 1 | 1 | 1 | 1 | 1 | 0 | 0 | 0 | 128   | 16/8     |
| 1 | 1 | 1 | 1 | 1 | 1 | 1 | 1 | 1 | 1 | 1 | 1 | 0 | 0 | 0 | 128   | 16/8     |
| 1 | 1 | 1 | 1 | 1 | 1 | 1 | 1 | 1 | 1 | 1 | 1 | 0 | 0 | 0 | > 512 | 8/4      |
| 1 | 1 | 1 | 1 | 1 | 1 | 1 | 1 | 1 | 1 | 1 | 1 | 0 | 0 | 0 | 256   | 16/8     |
| 1 | 1 | 1 | 1 | 1 | 1 | 1 | 1 | 1 | 1 | 1 | 1 | 0 | 0 | 0 | 128   | 32/16    |
| 1 | 1 | 1 | 1 | 1 | 1 | 1 | 1 | 1 | 1 | 1 | 1 | 0 | 0 | 0 | 256   | 32/16    |
| 1 | 1 | 1 | 1 | 1 | 1 | 1 | 1 | 1 | 1 | 1 | 1 | 0 | 0 | 0 | 256   | 32/16    |
| 1 | 1 | 1 | 1 | 1 | 1 | 1 | 1 | 1 | 1 | 1 | 1 | 0 | 0 | 0 | 512   | 16/8     |
| 1 | 1 | 1 | 1 | 1 | 1 | 1 | 1 | 1 | 1 | 1 | 1 | 0 | 0 | 0 | 512   | 32/16    |
| 1 | 1 | 1 | 1 | 1 | 1 | 1 | 1 | 1 | 1 | 1 | 1 | 0 | 0 | 0 | 512   | 16/8     |
| 1 | 1 | 1 | 1 | 1 | 1 | 1 | 1 | 1 | 1 | 1 | 1 | 0 | 0 | 0 | 256   | 16/8     |
| 1 | 1 | 1 | 1 | 1 | 1 | 1 | 1 | 1 | 1 | 1 | 1 | 0 | 0 | 0 | 1     | 0.5/0.25 |

|   |   |   |   |   |   |   |   |   |   |   |   |   |   |   |       |          |
|---|---|---|---|---|---|---|---|---|---|---|---|---|---|---|-------|----------|
| 1 | 1 | 1 | 1 | 1 | 1 | 1 | 1 | 1 | 1 | 1 | 1 | 0 | 0 | 0 | 1     | 0.5/0.25 |
| 1 | 1 | 1 | 1 | 1 | 1 | 1 | 1 | 1 | 1 | 1 | 1 | 0 | 0 | 0 | 1     | 1/0.5    |
| 1 | 1 | 1 | 1 | 1 | 1 | 1 | 1 | 1 | 1 | 1 | 1 | 0 | 0 | 0 | 1     | 0.5/0.25 |
| 1 | 1 | 1 | 1 | 1 | 1 | 1 | 1 | 1 | 1 | 1 | 1 | 0 | 0 | 0 | 1     | 0.5/0.25 |
| 1 | 1 | 1 | 1 | 1 | 1 | 1 | 1 | 1 | 1 | 1 | 1 | 0 | 0 | 0 | 256   | 16/8     |
| 1 | 1 | 1 | 1 | 1 | 1 | 1 | 1 | 1 | 1 | 1 | 1 | 0 | 0 | 0 | 256   | 16/8     |
| 1 | 1 | 1 | 1 | 1 | 1 | 1 | 1 | 1 | 1 | 1 | 1 | 0 | 0 | 0 | > 512 | 8/4      |
| 1 | 1 | 0 | 0 | 1 | 1 | 1 | 1 | 0 | 1 | 1 | 1 | 0 | 0 | 0 | 128   | 16/8     |
| 1 | 1 | 1 | 1 | 1 | 1 | 1 | 1 | 1 | 1 | 1 | 1 | 0 | 0 | 0 | 256   | 16/8     |
| 1 | 1 | 1 | 1 | 1 | 1 | 1 | 1 | 1 | 1 | 1 | 1 | 0 | 0 | 0 | 256   | 16/8     |
| 1 | 1 | 1 | 1 | 1 | 1 | 1 | 1 | 1 | 1 | 1 | 1 | 0 | 0 | 0 | 256   | 16/8     |
| 1 | 1 | 1 | 1 | 1 | 1 | 1 | 1 | 1 | 1 | 1 | 1 | 0 | 0 | 1 | 1     | 1/0.5    |
| 1 | 1 | 1 | 1 | 1 | 1 | 1 | 1 | 1 | 1 | 1 | 1 | 0 | 0 | 0 | 32    | 8/4      |
| 1 | 1 | 1 | 1 | 1 | 1 | 1 | 1 | 1 | 1 | 1 | 1 | 0 | 0 | 0 | 64    | 16/8     |
| 1 | 1 | 1 | 1 | 1 | 1 | 1 | 1 | 1 | 1 | 1 | 1 | 0 | 0 | 1 | > 512 | 16/8     |
| 1 | 1 | 1 | 1 | 1 | 1 | 1 | 1 | 1 | 1 | 1 | 1 | 0 | 0 | 0 | 128   | 16/8     |
| 1 | 1 | 1 | 1 | 1 | 1 | 1 | 1 | 1 | 1 | 1 | 1 | 0 | 0 | 0 | 2     | 1/0.5    |
| 1 | 1 | 1 | 1 | 1 | 1 | 1 | 1 | 1 | 1 | 1 | 1 | 0 | 0 | 0 | > 512 | 4/2      |
| 1 | 1 | 1 | 1 | 1 | 1 | 1 | 1 | 1 | 1 | 1 | 1 | 0 | 0 | 0 | ≤0.25 | 0.5/0.25 |
| 1 | 1 | 1 | 1 | 1 | 1 | 1 | 1 | 1 | 1 | 1 | 1 | 0 | 0 | 0 | 1     | 1/0.5    |
| 1 | 1 | 1 | 1 | 1 | 1 | 1 | 1 | 1 | 1 | 1 | 1 | 0 | 0 | 0 | 1     | 1/0.5    |
| 1 | 1 | 1 | 1 | 1 | 1 | 1 | 1 | 1 | 1 | 1 | 1 | 0 | 0 | 0 | > 512 | 4/2      |
| 1 | 1 | 1 | 1 | 1 | 1 | 1 | 1 | 1 | 1 | 1 | 1 | 0 | 0 | 0 | > 512 | 4/2      |
| 1 | 1 | 1 | 1 | 1 | 1 | 1 | 1 | 1 | 1 | 1 | 1 | 0 | 0 | 0 | 0.5   | 0.5/0.25 |

| Gentamyci Spectinom Tetracyclir Florfenicol Sulfafurazı Sulfameth Ceftiofur Ceftazidim Enrofloxac Ofloxacin Meropener Colistin |           |             |             |             |           |           |            |            |           |           |          |
|--------------------------------------------------------------------------------------------------------------------------------|-----------|-------------|-------------|-------------|-----------|-----------|------------|------------|-----------|-----------|----------|
| Gentamyci                                                                                                                      | Spectinom | Tetracyclir | Florfenicol | Sulfafurazı | Sulfameth | Ceftiofur | Ceftazidim | Enrofloxac | Ofloxacin | Meropener | Colistin |
| 1                                                                                                                              | > 512     | 2           | 128         | 128         | > 32/608  | > 256     | 4          | 2          | 8         | ≤0.03     | 1        |
| 0.5                                                                                                                            | 64        | 128         | 256         | 512         | > 32/608  | 1         | 1          | 0.5        | 2         | ≤0.03     | 0.25     |
| 0.5                                                                                                                            | 64        | 128         | > 256       | > 512       | > 32/608  | 0.5       | 0.5        | 0.5        | 2         | ≤0.03     | 0.5      |
| 1                                                                                                                              | 64        | 64          | > 256       | > 512       | > 32/608  | 0.5       | 0.5        | 0.5        | 2         | ≤0.03     | 0.5      |
| 0.5                                                                                                                            | 64        | 2           | 4           | > 512       | 0.5/9.5   | 0.5       | 0.5        | 0.25       | 1         | ≤0.03     | 4        |
| > 512                                                                                                                          | > 512     | 128         | > 256       | > 512       | > 32/608  | > 256     | 16         | > 32       | > 64      | ≤0.03     | 0.5      |
| 1                                                                                                                              | 64        | 64          | 256         | > 512       | > 32/608  | 0.5       | 0.5        | 1          | 2         | ≤0.03     | 0.5      |
| 0.5                                                                                                                            | 64        | 2           | 2           | > 512       | 0.5/9.5   | 0.5       | 0.5        | 0.5        | 1         | ≤0.03     | 4        |
| 0.5                                                                                                                            | 64        | 64          | 2           | 8           | ≤0.06/1.2 | 0.5       | 0.25       | 0.03       | 0.06      | ≤0.03     | 0.5      |
| 0.5                                                                                                                            | 64        | 128         | > 256       | > 512       | > 32/608  | 1         | 0.5        | 1          | 2         | ≤0.03     | 0.5      |
| 0.5                                                                                                                            | 64        | 1           | 2           | 32          | ≤0.06/1.2 | 0.5       | 0.5        | 0.03       | 0.12      | ≤0.03     | 0.5      |
| 2                                                                                                                              | > 512     | 16          | 2           | 4           | > 32/608  | ≤0.12     | ≤0.12      | 1          | 1         | 0.5       | 8        |
| > 512                                                                                                                          | > 512     | 128         | > 256       | > 512       | > 32/608  | 256       | 32         | > 32       | > 64      | ≤0.03     | 0.5      |
| > 512                                                                                                                          | > 512     | 128         | > 256       | > 512       | > 32/608  | > 256     | 32         | > 32       | > 64      | ≤0.03     | 0.5      |
| > 512                                                                                                                          | > 512     | 128         | > 256       | > 512       | > 32/608  | 256       | 16         | > 32       | > 64      | ≤0.03     | 0.25     |
| 64                                                                                                                             | 64        | 128         | 2           | 16          | 0.125/2.4 | 1         | 0.25       | 0.25       | 1         | ≤0.03     | 4        |
| > 512                                                                                                                          | > 512     | 128         | > 256       | > 512       | > 32/608  | 128       | 16         | > 32       | 64        | ≤0.03     | 0.25     |
| 0.5                                                                                                                            | 128       | 1           | 2           | 64          | ≤0.06/1.2 | 1         | 0.5        | 0.06       | 0.12      | ≤0.03     | 1        |
| 128                                                                                                                            | 64        | 128         | 64          | 16          | ≤0.06/1.2 | 0.5       | 0.5        | 0.25       | 1         | ≤0.03     | 2        |
| 64                                                                                                                             | 64        | 128         | 2           | 32          | ≤0.06/1.2 | 1         | 0.5        | 0.5        | 1         | ≤0.03     | 2        |
| 64                                                                                                                             | 64        | 128         | 2           | 32          | ≤0.06/1.2 | 0.5       | 0.5        | 0.25       | 0.5       | ≤0.03     | 2        |
| > 512                                                                                                                          | > 512     | 128         | > 256       | > 512       | > 32/608  | 256       | 32         | > 32       | > 64      | ≤0.03     | 0.5      |
| 64                                                                                                                             | 64        | 64          | 2           | 32          | ≤0.06/1.2 | 0.5       | 0.5        | 0.25       | 0.5       | ≤0.03     | 2        |
| 64                                                                                                                             | 64        | 64          | 2           | 16          | ≤0.06/1.2 | 1         | 0.25       | 0.25       | 0.5       | ≤0.03     | 4        |
| 64                                                                                                                             | 64        | 64          | 2           | 16          | ≤0.06/1.2 | 0.5       | 0.5        | 0.25       | 0.5       | ≤0.03     | 2        |
| 64                                                                                                                             | 64        | 64          | 2           | 16          | ≤0.06/1.2 | 1         | 0.25       | 0.25       | 0.5       | ≤0.03     | 4        |
| 64                                                                                                                             | 64        | 1           | 2           | 64          | ≤0.06/1.2 | 0.5       | 0.5        | 0.25       | 0.5       | ≤0.03     | 4        |
| > 512                                                                                                                          | > 512     | 128         | > 256       | > 512       | > 32/608  | 128       | 16         | > 32       | > 64      | ≤0.03     | 0.25     |
| 0.5                                                                                                                            | 64        | 64          | 2           | > 512       | ≤0.06/1.2 | 0.5       | 1          | 0.5        | 1         | ≤0.03     | 1        |
| 0.5                                                                                                                            | 64        | 64          | 2           | 64          | ≤0.06/1.2 | 0.5       | 1          | 0.5        | 2         | ≤0.03     | 1        |
| 0.5                                                                                                                            | 64        | 64          | 2           | > 512       | ≤0.06/1.2 | 1         | 0.5        | 0.5        | 2         | ≤0.03     | 1        |
| 0.5                                                                                                                            | 64        | 64          | 2           | > 512       | ≤0.06/1.2 | 0.5       | 0.25       | 0.5        | 1         | ≤0.03     | 1        |
| 0.5                                                                                                                            | 64        | 64          | 2           | > 512       | ≤0.06/1.2 | 0.5       | 0.25       | 0.5        | 1         | ≤0.03     | 1        |
| ≤0.25                                                                                                                          | 64        | 128         | 2           | > 512       | 0.5/9.5   | 0.5       | 0.5        | 0.5        | 1         | ≤0.03     | 4        |
| ≤0.25                                                                                                                          | 64        | 128         | 2           | > 512       | 0.25/4.8  | 0.5       | 0.5        | 0.5        | 1         | ≤0.03     | 4        |
| ≤0.25                                                                                                                          | 64        | 128         | 2           | > 512       | 0.25/4.8  | 0.5       | 0.5        | 0.5        | 1         | ≤0.03     | 4        |
| 0.5                                                                                                                            | 64        | 1           | 2           | 32          | ≤0.06/1.2 | 0.5       | 0.5        | 0.03       | 0.12      | 0.25      | 1        |
| 0.5                                                                                                                            | 64        | 1           | 2           | 32          | ≤0.06/1.2 | 0.5       | 0.5        | 0.03       | 0.12      | 0.12      | 2        |

|     |       |     |       |       |           |       |      |       |      |       |      |
|-----|-------|-----|-------|-------|-----------|-------|------|-------|------|-------|------|
| 0.5 | 64    | 1   | 2     | 32    | ≤0.06/1.2 | 0.5   | 0.5  | 0.03  | 0.12 | ≤0.03 | 2    |
| 0.5 | 64    | 1   | 2     | 32    | ≤0.06/1.2 | 0.5   | 0.25 | 0.03  | 0.12 | ≤0.03 | 2    |
| 0.5 | 64    | 1   | 2     | 16    | ≤0.06/1.2 | 0.5   | 0.25 | 0.03  | 0.12 | ≤0.03 | 1    |
| 0.5 | 64    | 1   | 2     | 64    | ≤0.06/1.2 | 0.5   | 0.25 | ≤0.01 | 0.12 | ≤0.03 | 2    |
| 0.5 | > 512 | 1   | 2     | > 512 | > 32/608  | 1     | 0.25 | 0.25  | 0.5  | ≤0.03 | 4    |
| 0.5 | 64    | 1   | 2     | 32    | ≤0.06/1.2 | 0.5   | 0.25 | 0.03  | 0.12 | ≤0.03 | 2    |
| 0.5 | 64    | 1   | 2     | 16    | ≤0.06/1.2 | 0.5   | 0.25 | 0.03  | 0.12 | ≤0.03 | 1    |
| 0.5 | 64    | 2   | 2     | 32    | ≤0.06/1.2 | 0.25  | 0.25 | 0.03  | 0.12 | ≤0.03 | 1    |
| 0.5 | 64    | 1   | 2     | 32    | ≤0.06/1.2 | 0.25  | 0.5  | 0.03  | 0.12 | ≤0.03 | 1    |
| 0.5 | 64    | 1   | 2     | 32    | ≤0.06/1.2 | 0.5   | 0.5  | 0.03  | 0.12 | ≤0.03 | 1    |
| 0.5 | 64    | 1   | 2     | 32    | ≤0.06/1.2 | 0.5   | 0.5  | ≤0.01 | 0.12 | ≤0.03 | 2    |
| 0.5 | 64    | 1   | 2     | 16    | ≤0.06/1.2 | 0.5   | 0.25 | ≤0.01 | 0.12 | ≤0.03 | 1    |
| 64  | > 512 | 128 | > 256 | > 512 | > 32/608  | 256   | 16   | > 32  | > 64 | ≤0.03 | 0.25 |
| 64  | > 512 | 64  | 256   | > 512 | > 32/608  | > 256 | 8    | > 32  | 32   | ≤0.03 | 0.5  |
| 128 | > 512 | 128 | > 256 | > 512 | > 32/608  | 256   | 32   | > 32  | > 64 | ≤0.03 | 0.25 |
| 32  | > 512 | 128 | > 256 | > 512 | > 32/608  | 256   | 16   | > 32  | > 64 | ≤0.03 | 0.5  |
| 64  | > 512 | 256 | 256   | > 512 | > 32/608  | 256   | 16   | 16    | 64   | ≤0.03 | 0.5  |
| 128 | > 512 | 128 | > 256 | > 512 | > 32/608  | 256   | 16   | > 32  | > 64 | ≤0.03 | 0.25 |
| 16  | 64    | 128 | > 256 | > 512 | > 32/608  | 1     | 1    | 1     | 2    | ≤0.03 | 0.5  |
| 32  | 64    | 128 | > 256 | > 512 | > 32/608  | 1     | 0.5  | 1     | 4    | ≤0.03 | 0.5  |
| 32  | 64    | 128 | > 256 | > 512 | > 32/608  | 2     | 0.5  | 1     | 2    | ≤0.03 | 0.5  |
| 8   | 64    | 128 | > 256 | > 512 | > 32/608  | 1     | 0.5  | 0.5   | 2    | ≤0.03 | 0.5  |
| 16  | 64    | 128 | > 256 | > 512 | > 32/608  | 1     | 0.5  | 0.5   | 2    | ≤0.03 | 0.5  |
| 0.5 | 64    | 1   | 4     | 32    | ≤0.06/1.2 | 0.5   | 0.5  | 0.03  | 0.12 | ≤0.03 | 2    |
| 0.5 | 64    | 32  | 2     | > 512 | ≤0.06/1.2 | 0.5   | 0.25 | 0.5   | 2    | ≤0.03 | 1    |
| 0.5 | 64    | 64  | 2     | > 512 | ≤0.06/1.2 | 0.5   | 0.25 | 0.5   | 1    | ≤0.03 | 0.5  |
| 32  | > 512 | 128 | > 256 | > 512 | > 32/608  | 256   | 32   | > 32  | > 64 | ≤0.03 | 0.5  |
| 64  | > 512 | 128 | > 256 | > 512 | > 32/608  | 256   | 16   | > 32  | 64   | ≤0.03 | 0.5  |
| 64  | > 512 | 128 | > 256 | > 512 | > 32/608  | 256   | 16   | > 32  | > 64 | ≤0.03 | 0.5  |
| 128 | > 512 | 128 | > 256 | > 512 | > 32/608  | > 256 | 16   | > 32  | > 64 | ≤0.03 | 0.5  |
| 64  | > 512 | 128 | > 256 | > 512 | > 32/608  | 256   | 16   | > 32  | > 64 | ≤0.03 | 0.5  |
| 8   | 64    | 128 | > 256 | > 512 | > 32/608  | 1     | 0.5  | 1     | 2    | ≤0.03 | 0.5  |
| 16  | 128   | 128 | > 256 | > 512 | > 32/608  | 1     | 0.5  | 1     | 2    | ≤0.03 | 0.5  |
| 32  | > 512 | 128 | > 256 | > 512 | > 32/608  | 256   | 16   | > 32  | > 64 | ≤0.03 | 0.5  |
| 32  | > 512 | 128 | > 256 | > 512 | > 32/608  | 0.5   | 0.25 | 1     | 2    | ≤0.03 | 0.5  |
| 32  | > 512 | 128 | > 256 | > 512 | > 32/608  | 0.5   | 1    | 1     | 2    | ≤0.03 | 0.5  |
| 16  | > 512 | 128 | > 256 | > 512 | > 32/608  | 0.5   | 0.25 | 1     | 2    | ≤0.03 | 0.5  |
| 32  | > 512 | 128 | > 256 | > 512 | > 32/608  | 0.5   | 0.25 | 1     | 2    | ≤0.03 | 0.5  |
| 16  | > 512 | 128 | > 256 | > 512 | > 32/608  | 0.5   | 0.25 | 1     | 2    | ≤0.03 | 0.5  |
| 16  | > 512 | 128 | > 256 | > 512 | > 32/608  | 0.5   | 0.25 | 1     | 1    | ≤0.03 | 0.5  |
| 32  | > 512 | 128 | > 256 | > 512 | > 32/608  | 0.5   | 0.5  | 1     | 2    | ≤0.03 | 0.5  |
| 32  | > 512 | 128 | 256   | > 512 | > 32/608  | 0.5   | 0.5  | 1     | 2    | ≤0.03 | 1    |
| 0.5 | 64    | 64  | 128   | 32    | ≤0.06/1.2 | 0.5   | 0.5  | 0.5   | 2    | ≤0.03 | 0.5  |



|     |       |     |       |       |           |       |       |      |     |       |       |
|-----|-------|-----|-------|-------|-----------|-------|-------|------|-----|-------|-------|
| 0.5 | 64    | 64  | 128   | 32    | ≤0.06/1.2 | 0.5   | 0.5   | 0.5  | 1   | ≤0.03 | 0.5   |
| 0.5 | 64    | 64  | 128   | 16    | ≤0.06/1.2 | 0.5   | 0.5   | 0.5  | 2   | ≤0.03 | 0.25  |
| 0.5 | 64    | 64  | 128   | 16    | ≤0.06/1.2 | 0.5   | 0.5   | 0.5  | 2   | ≤0.03 | 0.5   |
| 0.5 | 64    | 64  | 128   | 16    | ≤0.06/1.2 | 0.5   | 0.5   | 0.5  | 2   | ≤0.03 | 0.5   |
| 0.5 | 256   | 64  | 256   | > 512 | > 32/608  | 0.5   | 0.5   | 0.25 | 0.5 | ≤0.03 | 0.5   |
| 0.5 | 256   | 64  | 256   | > 512 | > 32/608  | 1     | 1     | 0.25 | 0.5 | ≤0.03 | 0.25  |
| 0.5 | 64    | 64  | 256   | > 512 | 0.125/2.4 | 0.5   | 0.5   | 2    | 4   | ≤0.03 | 0.5   |
| 0.5 | 256   | 64  | 256   | > 512 | > 32/608  | 1     | 0.5   | 0.25 | 0.5 | ≤0.03 | 0.5   |
| 0.5 | 512   | 64  | 256   | > 512 | > 32/608  | 4     | 0.5   | 0.25 | 0.5 | ≤0.03 | 0.5   |
| 0.5 | 512   | 64  | 256   | > 512 | > 32/608  | 1     | 0.5   | 0.25 | 0.5 | ≤0.03 | 0.5   |
| 0.5 | 256   | 64  | 256   | > 512 | > 32/608  | 1     | 0.5   | 0.25 | 0.5 | ≤0.03 | 0.5   |
| 0.5 | 64    | 1   | 2     | > 512 | ≤0.06/1.2 | 0.5   | 0.25  | 0.25 | 1   | ≤0.03 | 1     |
| 0.5 | 512   | 1   | 256   | > 512 | > 32/608  | 0.25  | ≤0.12 | 0.12 | 0.5 | ≤0.03 | 0.5   |
| 0.5 | 256   | 64  | 256   | > 512 | > 32/608  | 0.5   | 0.5   | 0.25 | 0.5 | ≤0.03 | 0.5   |
| 1   | > 512 | 1   | 256   | 32    | > 32/608  | 256   | 4     | 2    | 8   | ≤0.03 | 0.5   |
| 1   | 256   | 64  | 256   | > 512 | > 32/608  | 0.5   | 0.5   | 0.25 | 0.5 | ≤0.03 | 0.25  |
| 0.5 | 32    | 128 | 4     | > 512 | ≤0.06/1.2 | 1     | 0.5   | 2    | 4   | ≤0.03 | 0.5   |
| 64  | > 512 | 128 | 256   | > 512 | > 32/608  | > 256 | 16    | > 32 | 64  | ≤0.03 | 0.5   |
| 1   | 32    | 32  | 128   | > 512 | ≤0.06/1.2 | 0.25  | 0.5   | 0.25 | 1   | ≤0.03 | 0.5   |
| 0.5 | 16    | 128 | 4     | > 512 | 0.125/2.4 | 0.5   | 0.5   | 1    | 2   | ≤0.03 | 0.25  |
| 0.5 | 16    | 64  | 4     | > 512 | ≤0.06/1.2 | 0.5   | 0.5   | 1    | 2   | ≤0.03 | ≤0.12 |
| 64  | > 512 | 4   | > 256 | > 512 | > 32/608  | > 256 | 16    | > 32 | 32  | ≤0.03 | 1     |
| 64  | > 512 | 128 | > 256 | > 512 | > 32/608  | > 256 | 32    | > 32 | 32  | ≤0.03 | 1     |
| 0.5 | 16    | 64  | 256   | > 512 | 0.125/2.4 | 0.25  | 0.25  | 0.5  | 1   | ≤0.03 | 2     |

**Table S4.** Antimicrobial-resistant patterns of 105 *Salmonella* isolates.

| ID | Antibiotic-resistant pattern                 | Number | Percentage% |
|----|----------------------------------------------|--------|-------------|
| 1  | GEM-SPT-AMP--CEF-CAZ--FFC-SF-SXT-ENR-OFL-TET | 20     | 19.05       |
| 2  | -                                            | 15     | 14.29       |
| 3  | SPT-AMP-FFC-SF-SXT-TET                       | 8      | 7.62        |
| 4  | AMP-SF-TET                                   | 6      | 5.72        |
| 5  | FFC-SF-SXT-TET                               | 5      | 4.77        |
| 6  | GEM-SPT-AMP-FFC-SF-SXT-TET                   | 5      | 4.77        |
| 7  | FFC-TET                                      | 5      | 4.77        |
| 8  | GEM-AMP-TET                                  | 4      | 3.81        |
| 9  | GEM-AMP-FFC-SF-SXT-TET                       | 4      | 3.81        |
| 10 | GEM-SPT-AMP-A/C-FFC-SF-SXT-TET               | 4      | 3.81        |
| 11 | GEM-AMP-TET-CL                               | 3      | 2.86        |
| 12 | SPT-AMP-CEF-FFC--SXT-ENR                     | 2      | 1.91        |
| 13 | AMP-SF-CL                                    | 2      | 1.91        |
| 14 | AMP-SF-TET-CL                                | 2      | 1.91        |
| 15 | AMP-FFC-SF-SXT-TET                           | 2      | 1.91        |
| 16 | FFC-SF-TET                                   | 2      | 1.91        |
| 17 | SF-TET                                       | 2      | 1.91        |
| 18 | TET                                          | 1      | 0.96        |
| 19 | SPT-AMP-A/C-SXT-TET-CL                       | 1      | 0.96        |
| 20 | SPT                                          | 1      | 0.96        |
| 21 | GEM-AMP-FFC-TET                              | 1      | 0.96        |
| 22 | GEM-AMP-CL                                   | 1      | 0.96        |
| 23 | AMP-TET                                      | 1      | 0.96        |
| 24 | SF-TET-CL                                    | 1      | 0.96        |
| 25 | SPT-AMP-SF-SXT-CL                            | 1      | 0.96        |
| 26 | GEM-SPT-AMP-CEF-FFC-SF-SXT-ENR-OFL-TET       | 1      | 0.96        |
| 27 | AMP-FFC-SF--ENR-TET                          | 1      | 0.96        |
| 28 | SF                                           | 1      | 0.96        |
| 29 | SPT-AMP-FFC-SF-SXT                           | 1      | 0.96        |
| 30 | SF-ENR-TET                                   | 1      | 0.96        |
| 31 | GEM-SPT-AMP-CEF-CAZ-FFC-SF-SXT-ENR-OFL       | 1      | 0.96        |

**Table S5.** the level of agreement between phenotypic-genotypic acquired antimicrobial resistance.

| <b>antibiotics</b>            | <b>concordance rate (%)</b> | <b>A (%)</b> | <b>B (%)</b> | <b>C (%)</b> | <b>D (%)</b> |
|-------------------------------|-----------------------------|--------------|--------------|--------------|--------------|
| Gentamycin                    | 83.82                       | 36.20        | 47.62        | 10.48        | 5.72         |
| Spectinomycin                 | 83.82                       | 37.15        | 46.67        | 10.48        | 5.72         |
| Ampicillin                    | 91.44                       | 61.91        | 29.53        | 2.86         | 5.72         |
| Amoxicillin-Clavulanic acid   | 84.77                       | 3.81         | 80.96        | 14.29        | 0.96         |
| Ceftiofur                     | 93.34                       | 20.00        | 73.34        | 3.81         | 2.86         |
| Ceftazidime                   | 90.49                       | 17.15        | 73.34        | 6.67         | 2.86         |
| Meropenem                     | 100.00                      | 0.00         | 100.00       | 0.00         | 0.00         |
| Florfenicol                   | 89.54                       | 52.39        | 37.15        | 3.81         | 6.67         |
| Sulfafurazole                 | 77.15                       | 38.1         | 39.05        | 8.58         | 14.29        |
| Sulfamethoxazole-Trimethoprim | 91.44                       | 46.67        | 44.77        | 2.86         | 5.72         |
| Enrofloxacin                  | 69.53                       | 19.05        | 50.48        | 24.77        | 5.72         |
| Ofloxacin                     | 65.72                       | 15.24        | 50.48        | 28.58        | 5.72         |
| Tetracycline                  | 91.44                       | 69.53        | 21.91        | 1.91         | 6.67         |
| Colistin                      | 89.53                       | 0.00         | 89.53        | 0.00         | 10.48        |

A: both genotype and phenotype were positive

B: both genotype and phenotype were negative

C: only genotypes of acquired AMR genes are present

D: only AMR phenotypes are present

**Table S6.** MIC breakpoints for *Salmonella* in this study

| Antibiotics                   | MIC breakpoints ( $\mu\text{g/mL}$ ) |        |              |
|-------------------------------|--------------------------------------|--------|--------------|
|                               | S                                    | I      | R            |
| Ampicillin                    | $\leq 8$                             | 16     | $\geq 32$    |
| Amoxicillin-Clavulanic acid   | $\leq 8/4$                           | 16/8   | $\geq 32/16$ |
| Ceftiofur                     | $\leq 2$                             | 4      | $\geq 8$     |
| Ceftazidime                   | $\leq 4$                             | 8      | $\geq 16$    |
| Meropenem                     | $\leq 1$                             | 2      | $\geq 4$     |
| Spectinomycin                 | $\leq 32$                            | 64     | $\geq 128$   |
| Gentamycin                    | $\leq 4$                             | 8      | $\geq 16$    |
| Tetracycline                  | $\leq 4$                             | 8      | $\geq 16$    |
| Florfenicol                   | $\leq 4$                             | 8      | $\geq 16$    |
| Sulfafurazole                 | $\leq 256$                           | -      | $\geq 512$   |
| Sulfamethoxazole-Trimethoprim | $\leq 2/38$                          | -      | $\geq 4/76$  |
| Enrofloxacin                  | $\leq 0.5$                           | 0.25~1 | $\geq 2$     |
| Ofloxacin                     | $\leq 0.12$                          | 0.25-1 | $\geq 2$     |
| Colistin                      | $\leq 2$                             | -      | $\geq 4$     |

S, susceptible; I, intermediate; R, resistant; “-”, Indicates that there is no corresponding criterion.
